# Supplementary material for: Quantifying black carbon light absorption enhancement with a novel statistical approach
Source: Copernicus journal article supplement (doi:10.5194/acp-18-289-2018), 2018-01-11
Supplement: Supplementary file 1 [file acp-18-289-2018-supplement.pdf]

Supplement of Atmos. Chem. Phys., 18, 289–309, 2018  
<https://doi.org/10.5194/acp-18-289-2018-supplement>  
© Author(s) 2018. This work is distributed under  
the Creative Commons Attribution 4.0 License.

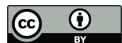

*Supplement of*

## **Quantifying black carbon light absorption enhancement with a novel statistical approach**

**Cheng Wu et al.**

*Correspondence to:* Cheng Wu ([wucheng.vip@foxmail.com](mailto:wucheng.vip@foxmail.com)) and Jian Zhen Yu ([jian.yu@ust.hk](mailto:jian.yu@ust.hk))

The copyright of individual parts of the supplement might differ from the CC BY 4.0 License.

This SI contains five tables and twenty-five figures.

## Uncertainty of $E_{abs}$ estimation

The uncertainty of  $E_{abs}$  estimation depends on uncertainty propagation from MAE uncertainty, which can be calculated from (Harris, 2010):

$$MAE_{Unc} = MAE \times \sqrt{\left(\frac{\sigma_{abs,Unc}}{\sigma_{abs}}\right)^2 + \left(\frac{EC_{Unc}}{EC}\right)^2} \quad S1$$

$$E_{abs,Unc} = E_{abs} \times \sqrt{\left(\frac{MAE_{Unc}}{MAE}\right)^2 + \left(\frac{MAE_{p,Unc}}{MAE_p}\right)^2} \quad S2$$

## Descriptions of customized programs used in this study for data analysis and visualization

Several computer programs were developed to meet specific research purpose in this study. All the programs are based on Igor Pro (www.wavemetrics.com) that provides a friendly GUI. Brief descriptions are given below.

### MRS program (Igor Pro based)

The program (Figure S21) is written in Igor Pro (WaveMetrics, Inc. Lake Oswego, OR, USA) to feasible MRS calculation via a user-friendly GUI. The MRS application is not limited in SOC estimation, but can also be extended to other applications (e.g.  $E_{abs}$  estimation) as long as a reliable tracer is available.

MRS calculation can be done by different temporal cycles (batch calculation): by year, by year&season, by season, by year&month, by month, by year&month&hour. Data filter is also available to calculate MRS on a specific subset of data.

The program is available from <https://sites.google.com/site/wuchengust>.

### Mie program and source code written in Igor Pro

A computer program (Figure S22) written in Igor Pro (WaveMetrics, Inc. Lake Oswego, OR, USA) for Mie scattering calculation. Both BHMIE and BHCOAT (coated particles) algorithms(Bohren and Huffman, 1983) are included. The program is also capable of batch calculation for both algorithms. Available from <https://sites.google.com/site/wuchengust>.

### **Aethalometer data processing program (Igor Pro based)**

This handy tool (Figure S23) can perform different corrections (e.g. Weingartner, Virkkula) on Aethalometer data. Raw Aethalometer data suffers from several artifacts including filter matrix effect (multiple scattering), loading effect (shadowing) and scattering effect. Careful corrections are needed for reporting light absorption coefficient from attenuation measurement. This Igor based program can directly import Aethalometer raw data and perform corrections (algorithm can be selected by user). Results can be exported to .csv files. Extra information including statistics of sensor voltage from each channel, sampling flow rate, etc are plotted for a quick QA/QC check. Available from <https://sites.google.com/site/wuchengust>.

### **Histbox program (Igor Pro based)**

A handy tool (Figure S24) to generate histogram and box plots with many powerful features. Data can be sorted by different time scale and batch plotting is available. Available from <https://sites.google.com/site/wuchengust>.

### **Scatter plot program (Igor Pro based)**

Scatter plot (Figure S25) is a useful tool to maximize the efficiency of data visualization in atmospheric science. The program includes Deming, WODR and York algorithm for linear regression, which consider uncertainties in both X and Y, that is more realistic for atmospheric applications (Wu and Yu, 2017). It is Igor based, and packed with lots of useful features for data analysis and graph plotting, including batch plotting, data masking via GUI, color coding in Z axis, data filtering and grouping. Available from <https://sites.google.com/site/wuchengust>.

## References

- Andreae, M. O., Schmid, O., Yang, H., Chand, D., Yu, J. Z., Zeng, L. M., and Zhang, Y. H.: Optical properties and chemical composition of the atmospheric aerosol in urban Guangzhou, China, *Atmos. Environ.*, 42, 6335-6350, doi: 10.1016/j.atmosenv.2008.01.030, 2008.
- Bohren, C. F. and Huffman, D. R.: *Absorption and scattering of light by small particles*, Wiley, New York, xiv, 530 p. pp., 1983.
- Chan, T. W., Brook, J. R., Smallwood, G. J., and Lu, G.: Time-resolved measurements of black carbon light absorption enhancement in urban and near-urban locations of southern Ontario, Canada, *Atmos. Chem. Phys.*, 11, 10407-10432, doi: 10.5194/acp-11-10407-2011, 2011.
- Chow, J. C., Watson, J. G., Doraiswamy, P., Chen, L. W. A., Sodeman, D. A., Lowenthal, D. H., Park, K., Arnott, W. P., and Motallebi, N.: Aerosol light absorption, black carbon, and elemental carbon at the Fresno Supersite, California, *Atmos Res*, 93, 874-887, doi: 10.1016/j.atmosres.2009.04.010, 2009.
- Chuang, P. Y., Duvall, R. M., Bae, M. S., Jefferson, A., Schauer, J. J., Yang, H., Yu, J. Z., and Kim, J.: Observations of elemental carbon and absorption during ACE-Asia and implications for aerosol radiative properties and climate forcing, *J. Geophys. Res.*, 108, 8634, doi: 10.1029/2002jd003254, 2003.
- Doran, J. C., Barnard, J. C., Arnott, W. P., Cary, R., Coulter, R., Fast, J. D., Kassianov, E. I., Kleinman, L., Laulainen, N. S., Martin, T., Paredes-Miranda, G., Pekour, M. S., Shaw, W. J., Smith, D. F., Springston, S. R., and Yu, X. Y.: The T1-T2 study: evolution of aerosol properties downwind of Mexico City, *Atmos. Chem. Phys.*, 7, 1585-1598, doi: 10.5194/acp-7-1585-2007, 2007.
- Harris, D. C.: *Quantitative chemical analysis*, 8th ed., W.H. Freeman and Co., New York, 2010.
- Knox, A., Evans, G. J., Brook, J. R., Yao, X., Jeong, C. H., Godri, K. J., Sabaliauskas, K., and Slowik, J. G.: Mass Absorption Cross-Section of Ambient Black Carbon Aerosol in Relation to Chemical Age, *Aerosol. Sci. Technol.*, 43, 522-532, doi: 10.1080/02786820902777207, 2009.
- Lack, D. A. and Cappa, C. D.: Impact of brown and clear carbon on light absorption enhancement, single scatter albedo and absorption wavelength dependence of black carbon, *Atmos. Chem. Phys.*, 10, 4207-4220, doi: 10.5194/acp-10-4207-2010, 2010.
- Lan, Z.-J., Huang, X.-F., Yu, K.-Y., Sun, T.-L., Zeng, L.-W., and Hu, M.: Light absorption of black carbon aerosol and its enhancement by mixing state in an urban atmosphere in South China, *Atmos. Environ.*, 69, 118-123, doi: 10.1016/j.atmosenv.2012.12.009, 2013.
- Liu, D., Flynn, M., Gysel, M., Targino, A., Crawford, I., Bower, K., Choularton, T., Jurányi, Z., Steinbacher, M., Hüglin, C., Curtius, J., Kampus, M., Petzold, A., Weingartner, E., Baltensperger, U., and Coe, H.: Single particle characterization of black carbon aerosols at a tropospheric alpine site in Switzerland, *Atmos. Chem. Phys.*, 10, 7389-7407, doi: 10.5194/acp-10-7389-2010, 2010.
- Mayol-Bracero, O. L., Gabriel, R., Andreae, M. O., Kirchstetter, T. W., Novakov, T., Ogren, J., Sheridan, P., and Streets, D. G.: Carbonaceous aerosols over the Indian Ocean during the Indian Ocean Experiment (INDOEX): Chemical characterization, optical properties, and probable sources, *J. Geophys. Res.*, 107, 8030, doi: 10.1029/2000jd000039, 2002.
- Moosmuller, H., Chakrabarty, R. K., Ehlers, K. M., and Arnott, W. P.: Absorption Angstrom coefficient, brown carbon, and aerosols: basic concepts, bulk matter, and spherical particles, *Atmos. Chem. Phys.*, 11, 1217-1225, doi: 10.5194/acp-11-1217-2011, 2011.
- Naoe, H., Hasegawa, S., Heintzenberg, J., Okada, K., Uchiyama, A., Zaizen, Y., Kobayashi, E., and Yamazaki, A.: State of mixture of atmospheric submicrometer black carbon particles and its effect on particulate light absorption, *Atmos. Environ.*, 43, 1296-1301, doi: 10.1016/j.atmosenv.2008.11.031, 2009.

Pandolfi, M., Cusack, M., Alastuey, A., and Querol, X.: Variability of aerosol optical properties in the Western Mediterranean Basin, *Atmos. Chem. Phys.*, 11, 8189-8203, doi: 10.5194/acp-11-8189-2011, 2011.

Thompson, J. E., Hayes, P. L., Jimenez, K. A. J. L., Zhang, X., Liu, J., Weber, R. J., and Buseck, P. R.: Aerosol Optical Properties at Pasadena, CA During CalNex 2010, *Atmos Environ*, doi: 10.1016/j.atmosenv.2012.03.011, 2012.

Wang, Q., Huang, R., Zhao, Z., Cao, J., Ni, H., Tie, X., Zhu, C., Shen, Z., Wang, M., and Dai, W.: Effects of photochemical oxidation on the mixing state and light absorption of black carbon in the urban atmosphere of China, *Environmental Research Letters*, 12, 044012, 2017.

Wang, Q. Y., Huang, R. J., Cao, J. J., Han, Y. M., Wang, G. H., Li, G. H., Wang, Y. C., Dai, W. T., Zhang, R. J., and Zhou, Y. Q.: Mixing State of Black Carbon Aerosol in a Heavily Polluted Urban Area of China: Implications for Light Absorption Enhancement, *Aerosol. Sci. Technol.*, 48, 689-697, doi: 10.1080/02786826.2014.917758, 2014.

Wu, C. and Yu, J. Z.: Evaluation of linear regression techniques for atmospheric applications: The importance of appropriate weighting, *Atmos. Meas. Tech. Discuss.*, 2017, 1-31, doi: 10.5194/amt-2017-300, 2017.

Xu, J., Bergin, M. H., Yu, X., Liu, G., Zhao, J., Carrico, C. M., and Baumann, K.: Measurement of aerosol chemical, physical and radiative properties in the Yangtze delta region of China, *Atmos. Environ.*, 36, 161-173, doi: 10.1016/S1352-2310(01)00455-1, 2002.

Yang, M., Howell, S. G., Zhuang, J., and Huebert, B. J.: Attribution of aerosol light absorption to black carbon, brown carbon, and dust in China - interpretations of atmospheric measurements during EAST-AIRE, *Atmos. Chem. Phys.*, 9, 2035-2050, doi: 10.5194/acp-9-2035-2009, 2009.

**Table S1.** Comparison of Mass absorption efficiency (MAE) at various locations. For literature MAE values at different wavelengths rather than 550 nm, an estimated MAE<sub>550</sub> is given in the brackets following equations given by Moosmuller et al. (2011) assuming AAE of 1.

| Location                 | Type                            | Sampling Duration | Inlet             | $\lambda$ (nm) | $\sigma_{\text{abs}}$ Instrument | EC determination protocol | $\sigma_{\text{abs}} \pm 1$ S.D. (Mm <sup>-1</sup> ) | EC mass ( $\mu\text{g m}^{-3}$ ) | estimated MAE <sub>p</sub> * (m <sup>2</sup> g <sup>-1</sup> ) | observed MAE (m <sup>2</sup> g <sup>-1</sup> ) |              | Reference                    |
|--------------------------|---------------------------------|-------------------|-------------------|----------------|----------------------------------|---------------------------|------------------------------------------------------|----------------------------------|----------------------------------------------------------------|------------------------------------------------|--------------|------------------------------|
|                          |                                 |                   |                   |                |                                  |                           |                                                      |                                  |                                                                | arithmetic mean $\pm 1$ S.D.                   | Gaussian fit |                              |
| Guangzhou, China         | Suburban                        | 2012.2-2013.1     | PM <sub>2.5</sub> | 550            | AE                               | NIOSH_TOT                 | 42.65±29.41                                          | 2.66±2.27                        | 13*                                                            | 18.75±6.16                                     | 16.16        | This study                   |
| Shenzhen, China          | Urban                           | 2011.8-9          | PM <sub>2.5</sub> | 532            | PAS                              | LII                       | 25.4±19.0                                            | 4.0±3.1                          | /                                                              | 6.5±0.5[6.29±0.48]                             | /            | (Lan et al., 2013)           |
| Xi'an, China             | Urban                           | 2012.12-2013.1    | PM <sub>2.5</sub> | 870            | PAS                              | LII                       | /                                                    | 8.8±7.3                          | 7.17[11.34]                                                    | /                                              | 7.62[12.05]  | (Wang et al., 2014)          |
| Xi'an, China             | Urban                           | 2013.2            | PM <sub>2.5</sub> | 532            | PAS                              | LII                       | /                                                    | /                                | /                                                              | 14.6±5.6                                       | 12.7         | (Wang et al., 2017)          |
| Guangzhou, China         | Urban                           | 2004.10           | PM <sub>2.5</sub> | 532            | PAS                              | NIOSH_TOT                 | 91±60                                                | 7.1                              | 7.7[7.44]                                                      | /                                              | /            | (Andreae et al., 2008)       |
| Fresno, USA              | Urban                           | 2005.8-9          | PM <sub>2.5</sub> | 532            | PAS                              | IMPROVE_A_TOR             | 5.06                                                 | 1.01                             | /                                                              | 6.1±2.5[5.9±2.42]                              | /            | (Chow et al., 2009)          |
|                          |                                 |                   |                   |                |                                  | NIOSH_TOT                 | /                                                    | 0.58                             | /                                                              | 9.3±2.4[8.99±2.32]                             | /            |                              |
| T1, Mexico city, Mexico  | Suburban                        | 2006.3            | PM <sub>2.5</sub> | 870            | PAS                              | NIOSH_TOT                 | /                                                    | /                                | /                                                              | 9.2~9.7***[14.55~15.34]                        | /            | (Doran et al., 2007)         |
| Tokyo, Japan             | Suburban                        | 2005.8            | PM <sub>2.5</sub> | 565            | PSAP                             | IMPROVE_A_TOR             | 30.43±20.41                                          | 2.9±2.13                         | 11±1                                                           | /                                              | /            | (Naoue et al., 2009)         |
| Pasadena, USA            | Urban                           | 2010.5-6          | PM <sub>2.5</sub> | 532            | AM                               | NIOSH_TOT                 | 3.8±3.4                                              | 0.6~0.7                          | 5.7[5.51]                                                      | /                                              | /            | (Thompson et al., 2012)      |
| Toronto, Canada          | Urban                           | 2006.12-2007.1    | PM <sub>2.5</sub> | 760            | PAS                              | NIOSH_TOT                 | /                                                    | /                                | 6.9~9.1**<br>[9.53~12.57]                                      | 9.3~9.9[12.85~13.68]                           | /            | (Knox et al., 2009)          |
| Toronto, Canada          | Suburban                        |                   |                   |                |                                  |                           | 3~6                                                  | 0.10~0.14                        | /                                                              | 30~43[42.6~61.06]                              | /            |                              |
| Windsor, Canada          | Urban                           | 2007.8            | PM <sub>2.5</sub> | 781            | PAS                              | LII                       | 4.4±2.9                                              | 0.27±0.23                        | /                                                              | 16±1[22.72±1.42]                               | /            | (Chan et al., 2011)          |
| Ottawa, Canada           | Urban                           |                   |                   |                |                                  |                           | 26±17                                                | 1.7±0.9                          | /                                                              | 15±3[21.3±4.26]                                | /            |                              |
| Beijing, China           | Rural                           | 2005.3            | /                 | 550            | AE                               | NIOSH_TOT                 | /                                                    | /                                | 9.5                                                            | 11.3                                           | /            | (Yang et al., 2009)          |
| Montseny, Spin           | Rural (Mediterranean)           | 2009.11-2010.10   | PM <sub>10</sub>  | 637            | MAAP                             | NIOSH_TOT                 | 2.8±2.2                                              | 0.271±0.215                      | /                                                              | 10.4[12.04]                                    | /            | (Pandolfi et al., 2011)      |
| Jungfrauoch, Switzerland | Rural (high alpine)             | 2007.2-3          | /                 | 637            | MAAP                             | LII                       | /                                                    | /                                | /                                                              | 10.2±3.2[11.81±3.71]                           | /            | (Liu et al., 2010)           |
| Lin'an, China            | Rural                           | 1999.11           | PM <sub>2.5</sub> | 550            | PSAP                             | NIOSH_TOT                 | 23±14                                                | 3.4±1.7                          | /                                                              | 8.6±7.0                                        | /            | (Xu et al., 2002)            |
| Jeju Island, Korea       | Coastal Rural, (East China Sea) | 2001.4            | PM <sub>10</sub>  | 550            | PSAP                             | NIOSH_TOT                 | /                                                    | /                                | /                                                              | 12.6±2.6                                       | /            | (Chuang et al., 2003)        |
| Maldives                 | Oceanic rural                   | 1999.2-3          | PM <sub>3</sub>   | 550            | PSAP                             | EGA                       | 62±34                                                | 2.5±1.4                          | 6.6                                                            | 8.1                                            | /            | (Mayol-Bracero et al., 2002) |

\*Determined by Minimum R Squared method; \*\* Median values;

AE: Aethalometer ; PAS photo acoustic spectrometer; MAAP: Multi Angle Absorption Photometer; PSAP: particle soot absorption photometer; AM: albedo meter; LII: Laser induced incandescence

**Table S2.** Statistics of monthly MAE<sub>550</sub> (m<sup>2</sup>g<sup>-1</sup>).

| Month    | 95th  | 75th  | 50th  | 25th  | 5th   | Mean  | Max   | Min   | S.D. | N   |
|----------|-------|-------|-------|-------|-------|-------|-------|-------|------|-----|
| Feb-2012 | 31.24 | 22.00 | 18.12 | 15.74 | 13.92 | 19.66 | 47.73 | 11.74 | 5.66 | 529 |
| Mar-2012 | 26.51 | 19.63 | 17.45 | 15.91 | 13.71 | 18.46 | 45.56 | 10.98 | 4.30 | 651 |
| Apr-2012 | 33.06 | 22.66 | 18.24 | 16.11 | 13.85 | 20.21 | 48.29 | 6.01  | 6.23 | 595 |
| May-2012 | 33.24 | 23.25 | 19.59 | 17.16 | 14.82 | 21.07 | 46.66 | 6.33  | 5.62 | 528 |
| Jun-2012 | 35.52 | 25.86 | 21.28 | 18.57 | 14.99 | 22.95 | 49.07 | 5.62  | 6.66 | 315 |
| Jul-2012 | 33.93 | 23.77 | 18.81 | 15.58 | 12.71 | 20.51 | 49.22 | 9.23  | 6.79 | 587 |
| Aug-2012 | 40.75 | 27.72 | 21.85 | 16.14 | 12.51 | 23.09 | 49.95 | 9.75  | 8.56 | 545 |
| Sep-2012 | 30.75 | 20.86 | 17.52 | 15.24 | 12.97 | 18.99 | 46.44 | 10.39 | 5.63 | 674 |
| Oct-2012 | 20.72 | 15.84 | 13.95 | 12.60 | 11.18 | 14.70 | 34.09 | 7.34  | 3.21 | 715 |
| Nov-2012 | 26.45 | 18.10 | 15.43 | 13.70 | 11.89 | 16.75 | 39.32 | 8.34  | 4.72 | 495 |
| Dec-2012 | 28.57 | 19.04 | 15.73 | 13.66 | 11.78 | 17.18 | 47.39 | 9.33  | 5.47 | 585 |
| Jan-2013 | 21.53 | 16.24 | 14.47 | 13.03 | 11.80 | 15.29 | 43.19 | 7.16  | 3.77 | 708 |

**Table S3.** Statistics of monthly AAE<sub>470-660</sub>.

| Month    | 95th | 75th | 50th | 25th | 5th  | Mean | Max  | Min  | S.D. | N   |
|----------|------|------|------|------|------|------|------|------|------|-----|
| Feb-2012 | 1.42 | 1.26 | 1.18 | 1.11 | 0.96 | 1.19 | 1.72 | 0.86 | 0.14 | 529 |
| Mar-2012 | 1.33 | 1.18 | 1.10 | 1.02 | 0.93 | 1.10 | 1.50 | 0.65 | 0.12 | 651 |
| Apr-2012 | 1.19 | 1.08 | 1.02 | 0.95 | 0.78 | 1.01 | 1.76 | 0.15 | 0.14 | 595 |
| May-2012 | 1.13 | 1.05 | 1.00 | 0.94 | 0.84 | 0.99 | 1.24 | 0.39 | 0.10 | 528 |
| Jun-2012 | 1.18 | 1.10 | 1.04 | 0.97 | 0.90 | 1.04 | 1.29 | 0.78 | 0.09 | 315 |
| Jul-2012 | 1.22 | 1.11 | 1.04 | 0.98 | 0.83 | 1.04 | 1.43 | 0.20 | 0.13 | 587 |
| Aug-2012 | 1.18 | 1.10 | 1.04 | 0.99 | 0.90 | 1.04 | 1.31 | 0.69 | 0.09 | 545 |
| Sep-2012 | 1.23 | 1.13 | 1.06 | 1.00 | 0.91 | 1.07 | 1.40 | 0.64 | 0.11 | 674 |
| Oct-2012 | 1.27 | 1.16 | 1.09 | 1.02 | 0.93 | 1.09 | 1.40 | 0.85 | 0.10 | 715 |
| Nov-2012 | 1.24 | 1.16 | 1.11 | 1.05 | 0.97 | 1.11 | 1.52 | 0.79 | 0.08 | 495 |
| Dec-2012 | 1.33 | 1.22 | 1.16 | 1.10 | 1.01 | 1.16 | 1.42 | 0.77 | 0.09 | 585 |
| Jan-2013 | 1.38 | 1.27 | 1.18 | 1.12 | 1.01 | 1.19 | 1.66 | 0.93 | 0.11 | 708 |

**Table S4.** Statistics of monthly SSA<sub>525</sub>.

| Month    | 95th | 75th | 50th | 25th | 5th  | Mean | Max  | Min  | S.D. | N   |
|----------|------|------|------|------|------|------|------|------|------|-----|
| Feb-2012 | 0.91 | 0.89 | 0.87 | 0.84 | 0.79 | 0.86 | 0.94 | 0.65 | 0.04 | 526 |
| Mar-2012 | 0.91 | 0.89 | 0.86 | 0.83 | 0.77 | 0.85 | 0.95 | 0.42 | 0.05 | 648 |
| Apr-2012 | 0.92 | 0.89 | 0.86 | 0.83 | 0.76 | 0.85 | 0.94 | 0.45 | 0.06 | 552 |
| May-2012 | 0.92 | 0.90 | 0.87 | 0.83 | 0.74 | 0.85 | 0.94 | 0.45 | 0.06 | 527 |
| Jun-2012 | 0.92 | 0.89 | 0.86 | 0.81 | 0.74 | 0.84 | 0.95 | 0.64 | 0.06 | 310 |
| Jul-2012 | 0.91 | 0.87 | 0.83 | 0.79 | 0.71 | 0.83 | 0.95 | 0.57 | 0.06 | 580 |
| Aug-2012 | 0.94 | 0.92 | 0.89 | 0.85 | 0.79 | 0.88 | 0.96 | 0.67 | 0.05 | 536 |
| Sep-2012 | 0.93 | 0.91 | 0.88 | 0.84 | 0.75 | 0.87 | 0.96 | 0.55 | 0.06 | 672 |
| Oct-2012 | 0.94 | 0.93 | 0.91 | 0.89 | 0.84 | 0.90 | 0.96 | 0.66 | 0.03 | 715 |
| Nov-2012 | 0.91 | 0.90 | 0.87 | 0.83 | 0.75 | 0.86 | 0.94 | 0.18 | 0.06 | 495 |
| Dec-2012 | 0.91 | 0.89 | 0.86 | 0.82 | 0.74 | 0.85 | 0.94 | 0.66 | 0.05 | 585 |
| Jan-2013 | 0.91 | 0.89 | 0.87 | 0.85 | 0.80 | 0.86 | 0.93 | 0.64 | 0.04 | 708 |

**Table S5.** Statistics of monthly E<sub>abs550</sub>.

| Month    | 95th | 75th | 50th | 25th | 5th  | Mean | Max  | Min  | S.D. | N   |
|----------|------|------|------|------|------|------|------|------|------|-----|
| Feb-2012 | 2.23 | 1.59 | 1.31 | 1.14 | 1.04 | 1.43 | 3.41 | 1.00 | 0.40 | 501 |
| Mar-2012 | 1.76 | 1.30 | 1.15 | 1.07 | 1.02 | 1.24 | 2.83 | 1.00 | 0.26 | 466 |
| Apr-2012 | 2.46 | 1.70 | 1.37 | 1.21 | 1.07 | 1.52 | 3.58 | 1.00 | 0.45 | 576 |
| May-2012 | 2.48 | 1.73 | 1.45 | 1.28 | 1.12 | 1.57 | 3.46 | 1.02 | 0.41 | 520 |
| Jun-2012 | 2.47 | 1.80 | 1.49 | 1.30 | 1.09 | 1.61 | 3.38 | 1.01 | 0.45 | 305 |
| Jul-2012 | 2.83 | 1.97 | 1.57 | 1.30 | 1.10 | 1.71 | 4.03 | 1.01 | 0.55 | 568 |
| Aug-2012 | 3.45 | 2.34 | 1.86 | 1.40 | 1.11 | 1.97 | 4.20 | 1.00 | 0.71 | 528 |
| Sep-2012 | 2.36 | 1.62 | 1.36 | 1.20 | 1.05 | 1.48 | 3.54 | 1.00 | 0.42 | 636 |
| Oct-2012 | 1.87 | 1.44 | 1.27 | 1.15 | 1.04 | 1.34 | 3.07 | 1.00 | 0.28 | 683 |
| Nov-2012 | 2.14 | 1.51 | 1.27 | 1.13 | 1.04 | 1.38 | 3.17 | 1.00 | 0.38 | 461 |
| Dec-2012 | 2.46 | 1.64 | 1.35 | 1.18 | 1.05 | 1.49 | 4.02 | 1.00 | 0.46 | 555 |
| Jan-2013 | 1.85 | 1.39 | 1.24 | 1.12 | 1.03 | 1.31 | 3.66 | 1.00 | 0.32 | 672 |



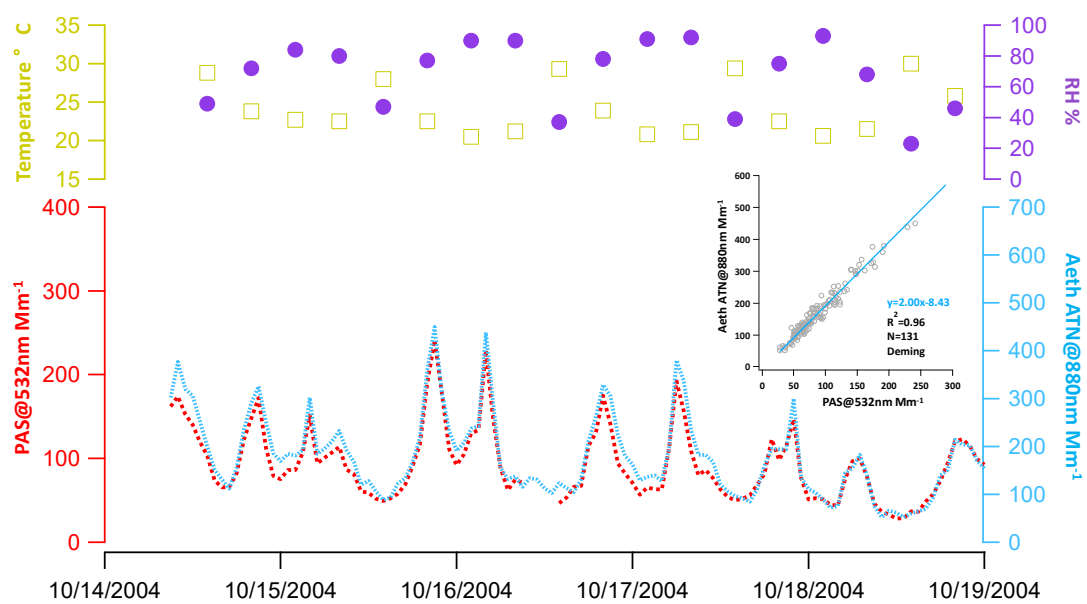

**Figure S1.** Comparison of collocated Aethalometer and PAS at Guangzhou (Oct 2004). Both PAS and Aethalometer (AE-16) were equipped with PM<sub>2.5</sub> inlets. RH of the sampled air was controlled to be <45% for PAS. Aethalometer sampling was conducted without RH control.

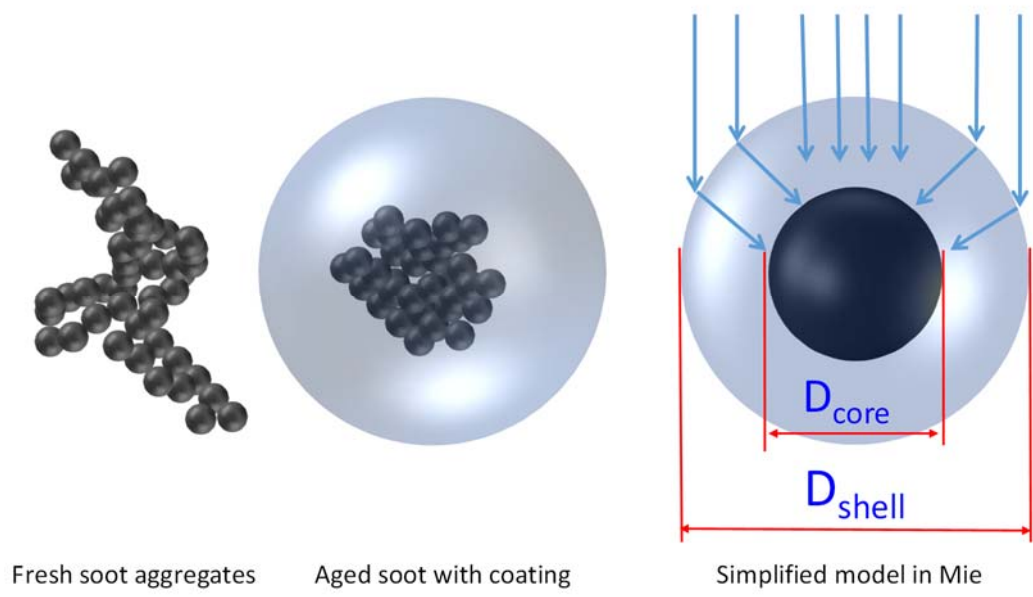

**Figure S2.** Schematic of the aging effect on light absorption. More light is absorbed by the soot particle core due to the lensing effect of the coating materials.

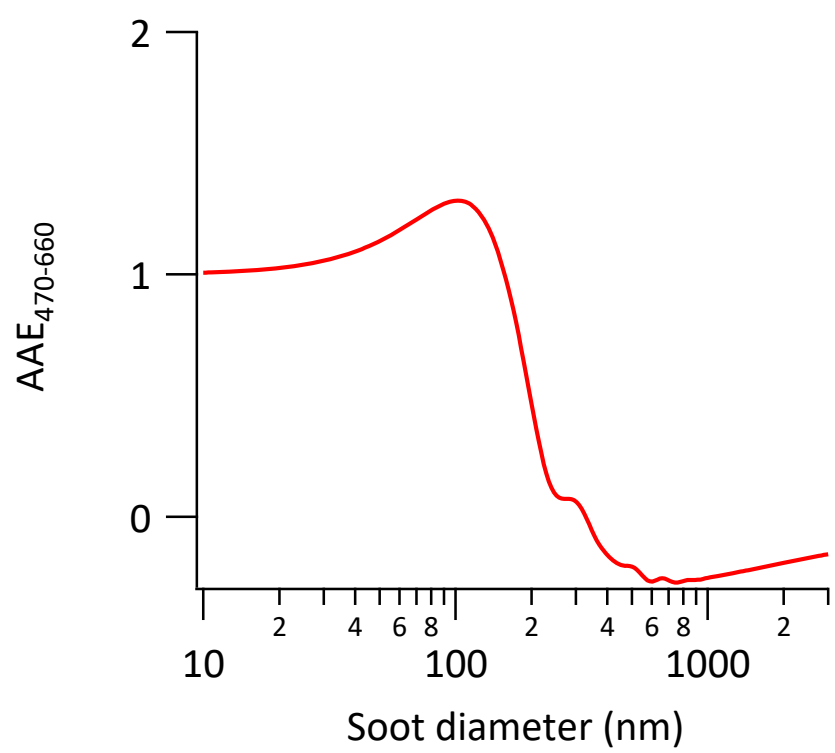

**Figure S3.** Mie simulated AAE<sub>470-660</sub> of a bare soot particle as a function of diameter with a Refractive index of 1.85 – 0.71i.

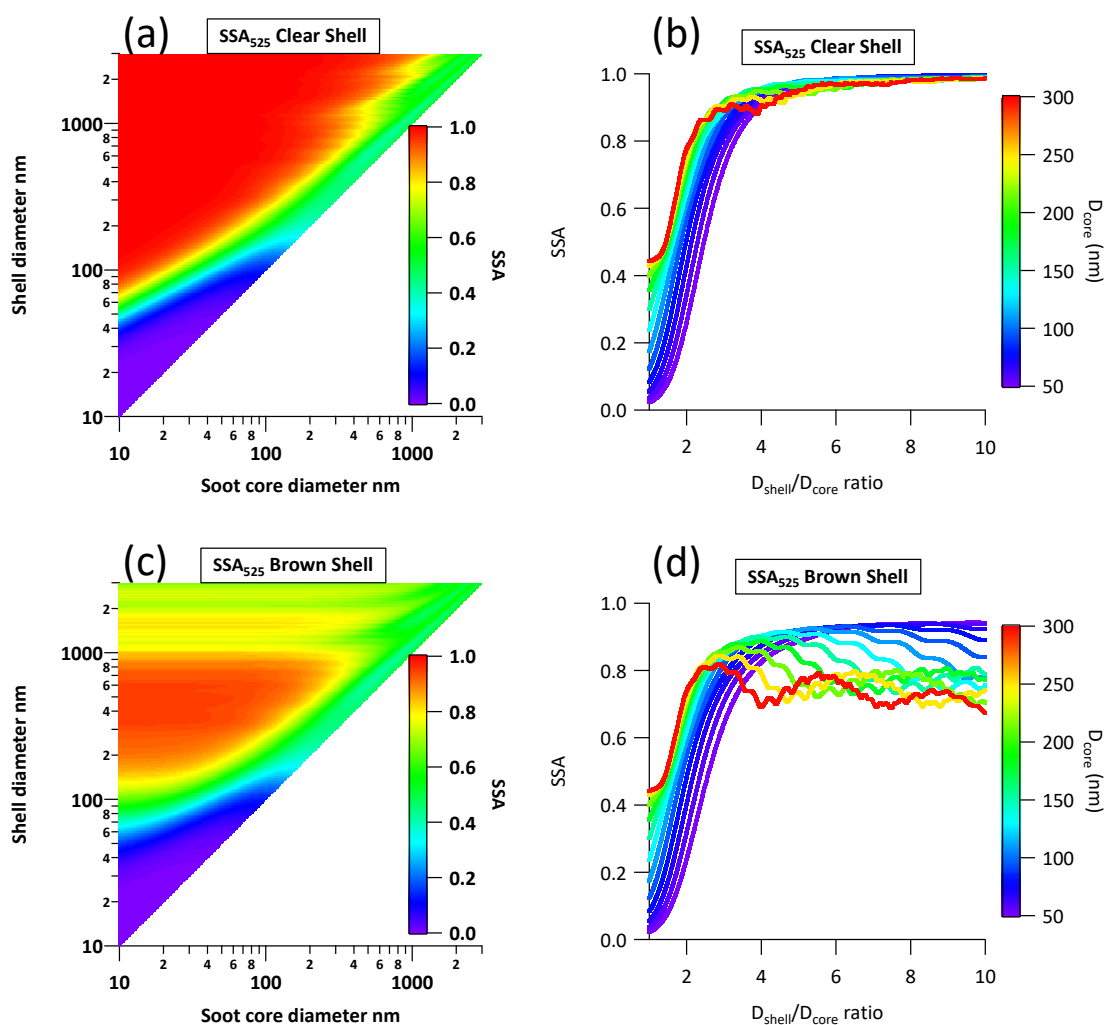

**Figure S4.** Mie simulated size dependency of soot particles SSA at wavelength 525 nm. (a) Combination of different clear shell (y axis) and core diameters (x axis). The color coding represents the SSA of a particle with specific core and clear shell size; (b) Cross-sections views of (a). The color coding represents different  $D_{\text{core}}$  in the range of 50 – 300 nm. (c)&(d) Similar to (a)&(b) but from the brown shell scenario.

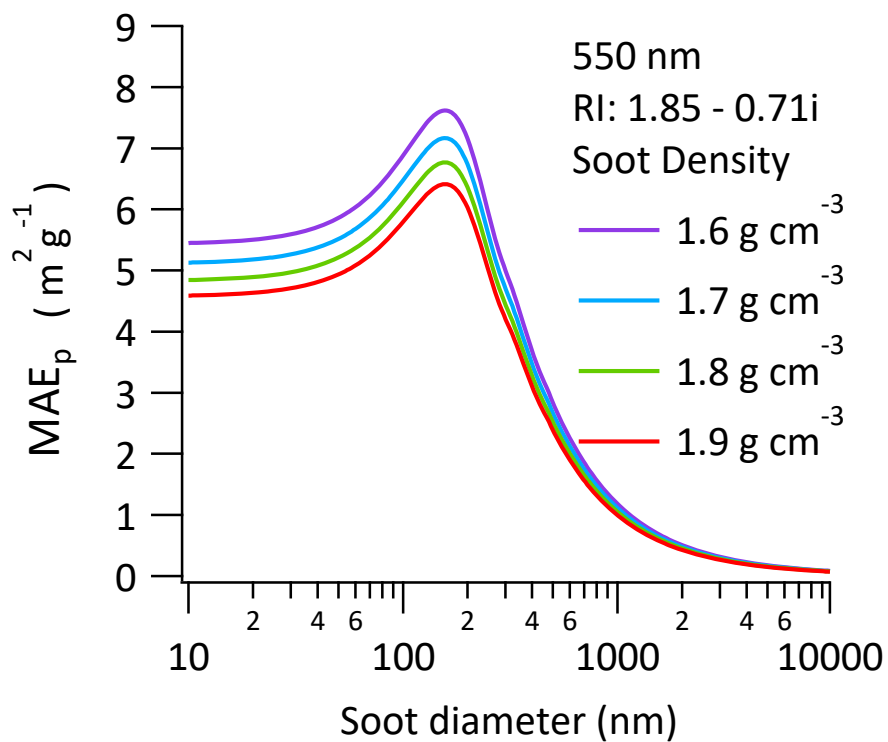

**Figure S5.** Mie simulated mass absorption efficiency (MAE<sub>p</sub>) of a bare soot particle as a function of diameter at a wavelength of 550nm. Refractive index is 1.85 – 0.71i and density varied from 1.6 to 1.9 g cm<sup>-3</sup>.

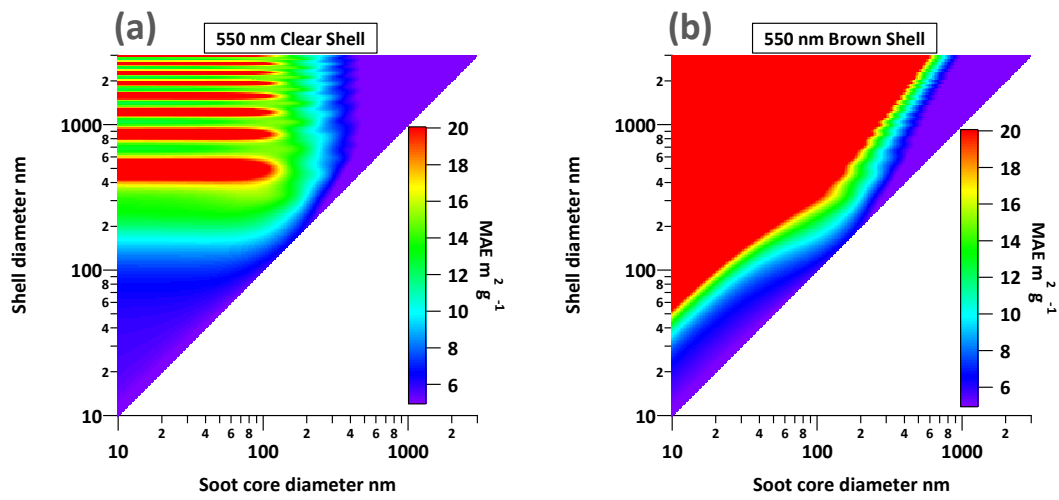

**Figure S6.** Mie simulated mass absorption efficiency (MAE) of a bare soot particle as a function of diameter at a wavelength of 550nm. Refractive index is  $1.85 - 0.71i$  and density is  $1.9 \text{ g cm}^{-3}$  for the soot core. Refractive index for clear coating is 1.55. Refractive index for brown coating is wavelength dependent adopted from Lack and Cappa (2010).

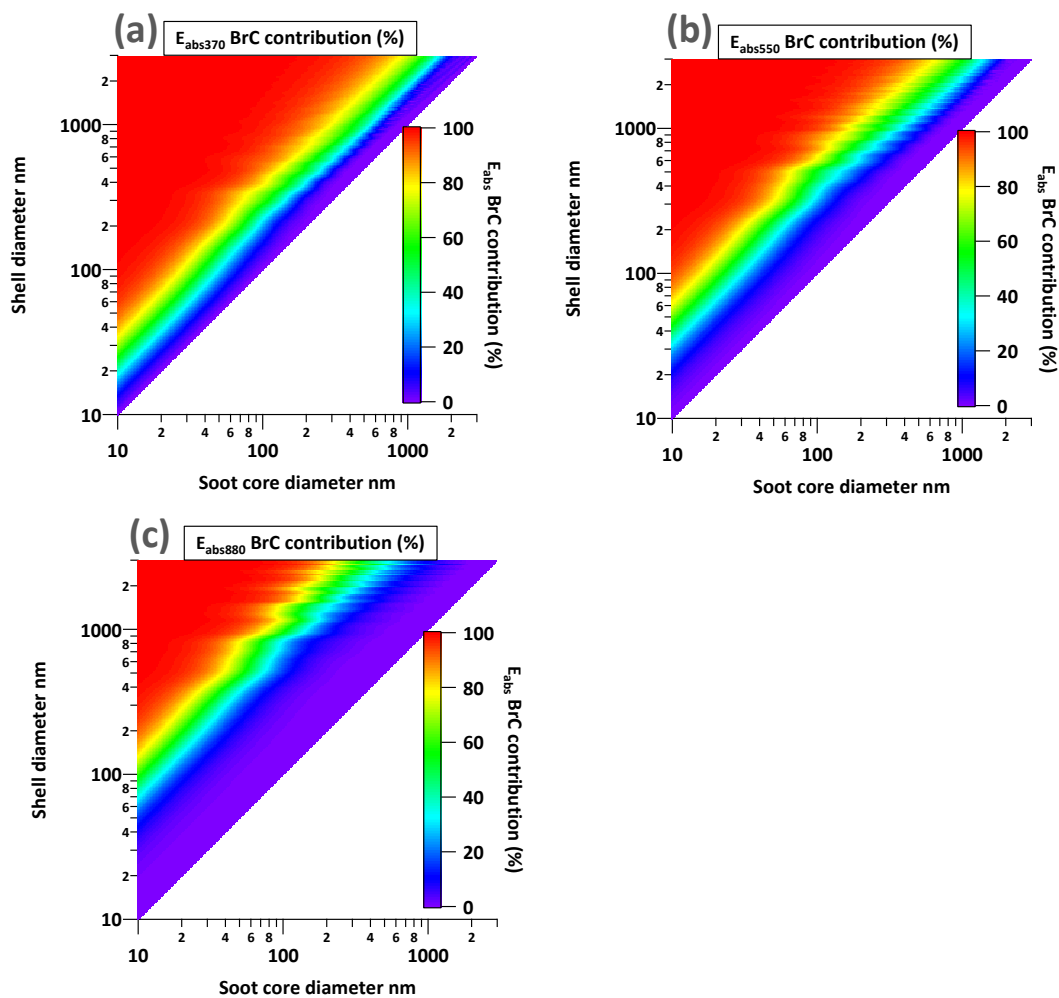

**Figure S7.** Mie simulated BrC absorption contribution to total  $E_{abs}$  (lensing effect + BrC absorption) in the brown shell scenario. The color coding represents fractional absorption contribution from BrC. (a) 370 nm (b) 550 nm (c) 880 nm.

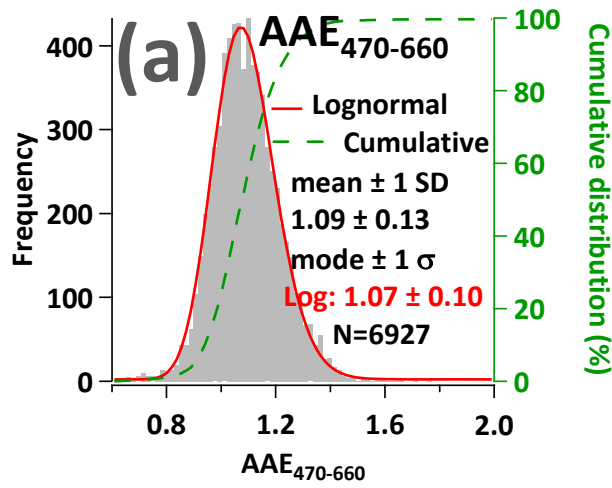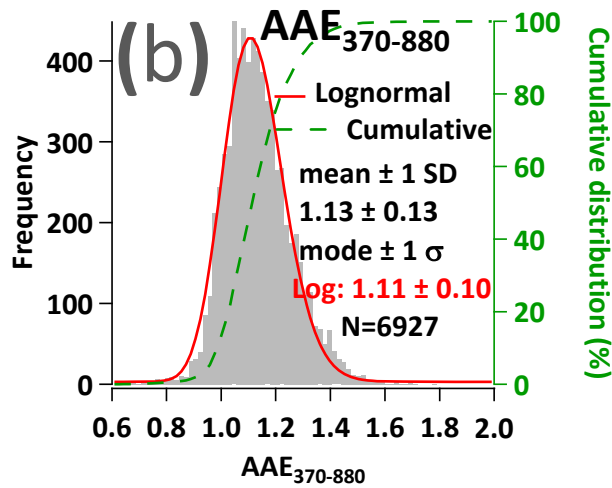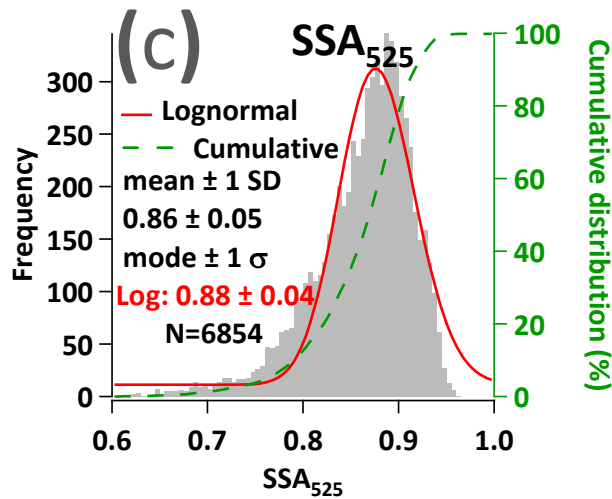

**Figure S8.** Measured annual statistics of AAE and SSA. (a) Annual frequency distribution of  $AAE_{470-660}$ . (b) Annual frequency distribution of  $AAE_{370-880}$ . (c) Annual frequency distribution of  $SSA_{525}$ . The red line represents lognormal fitting curve.

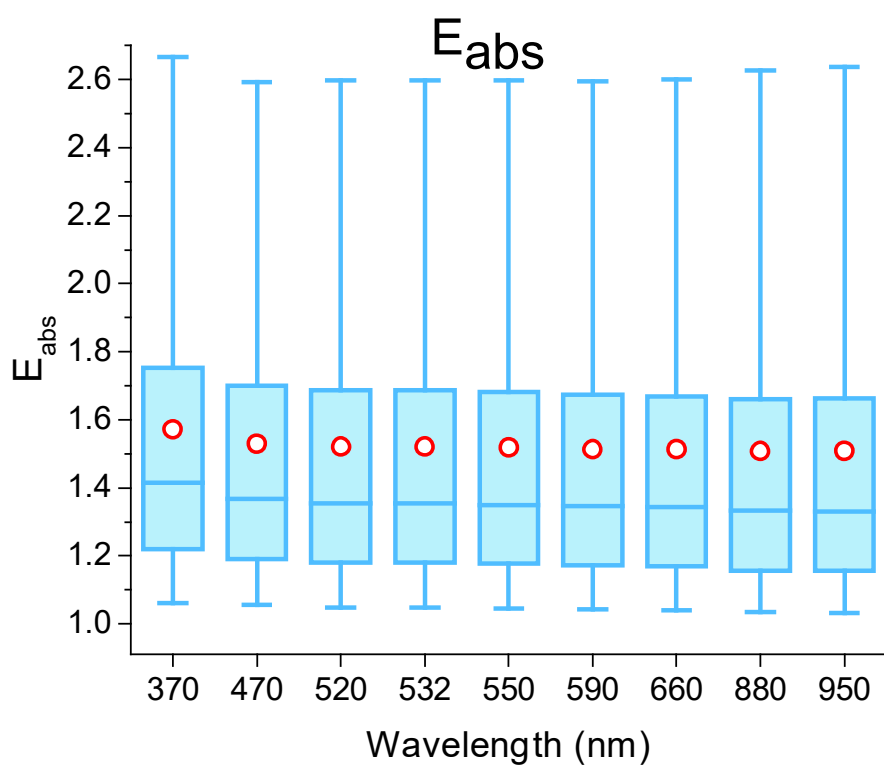

| Wavelength (nm)       | 370  | 470  | 520  | 532  | 550  | 590  | 660  | 880  | 950  |
|-----------------------|------|------|------|------|------|------|------|------|------|
| $E_{\text{abs}}$ mean | 1.55 | 1.51 | 1.50 | 1.50 | 1.50 | 1.49 | 1.49 | 1.48 | 1.49 |
| $E_{\text{abs}}$ S.D. | 0.48 | 0.47 | 0.47 | 0.47 | 0.48 | 0.47 | 0.48 | 0.49 | 0.49 |

**Figure S9.** Spectrum annual average  $E_{\text{abs}}$  from 370 to 950 nm.



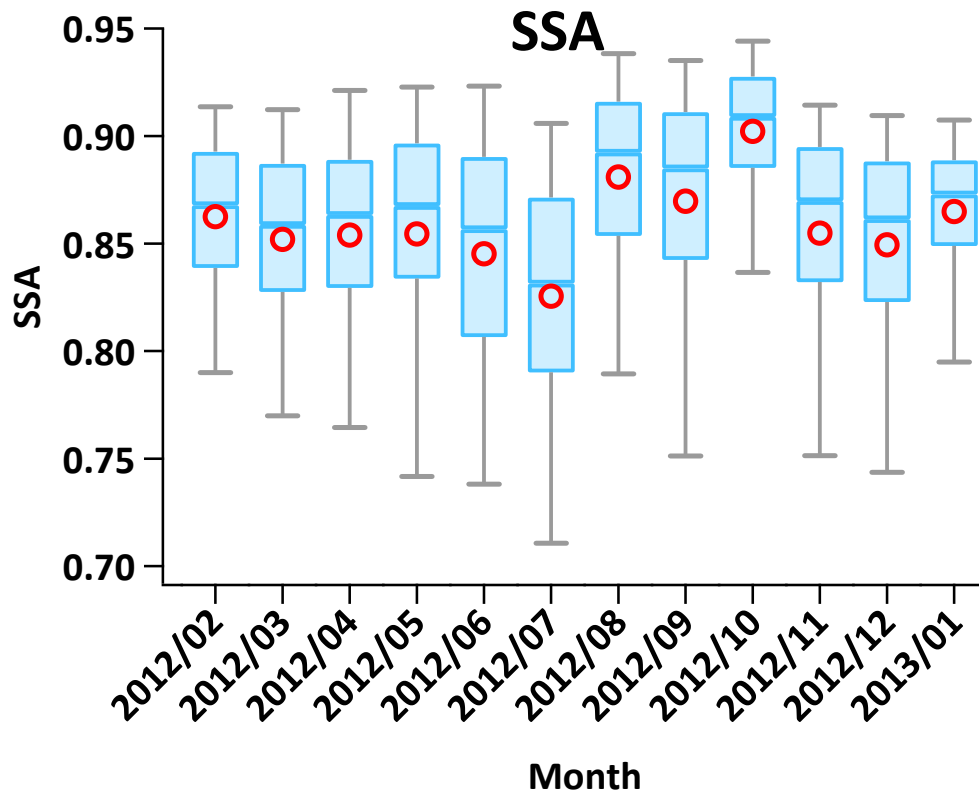

Figure S10. Measured monthly variations of SSA<sub>525</sub>.

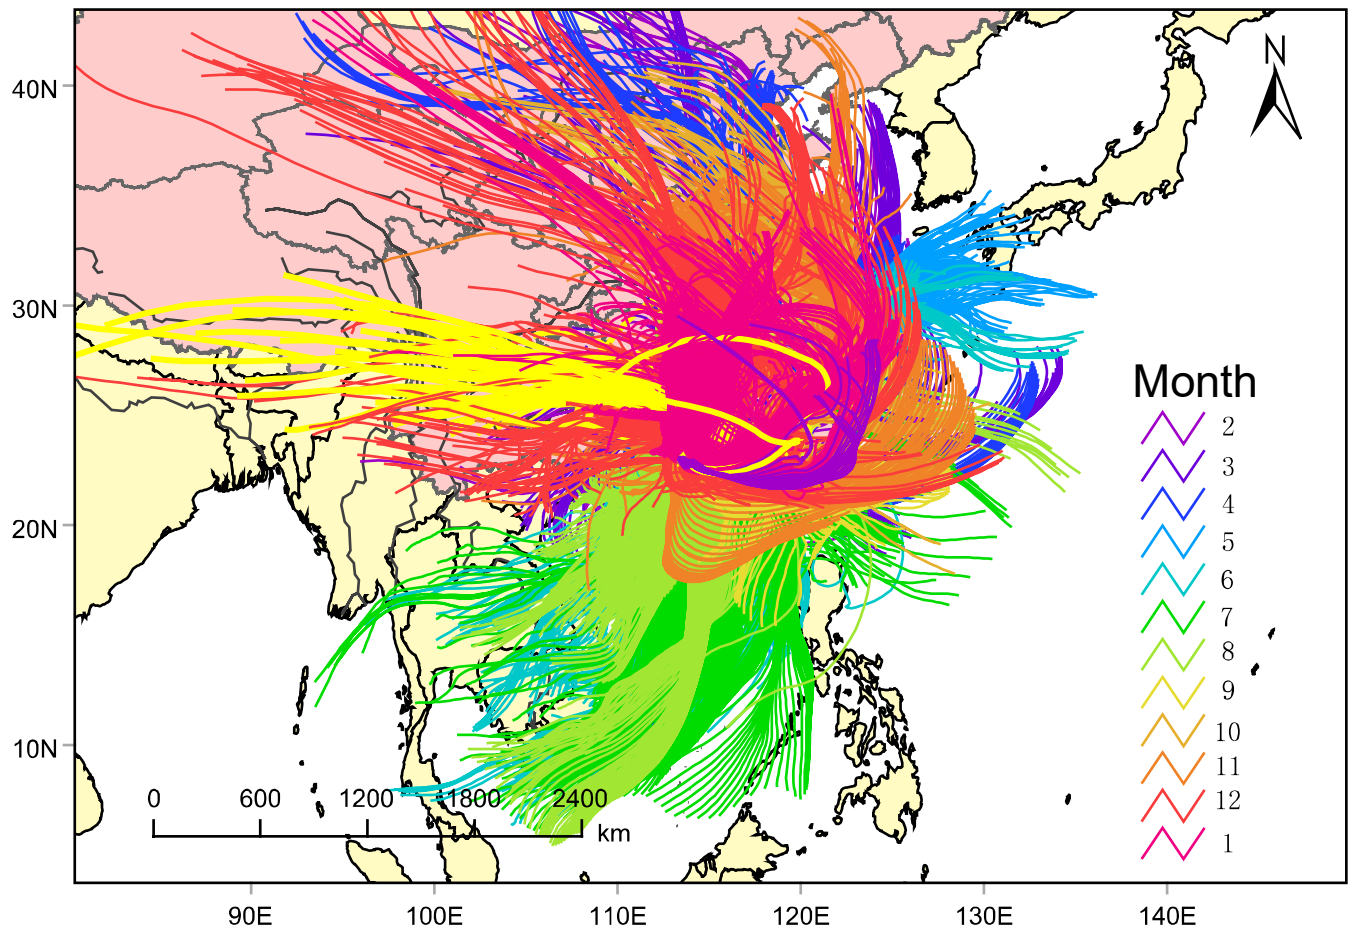

**Figure S11.** Hourly back trajectories for the past 72 hours calculated using NOAA's HYSPLIT model from Feb 2012 to Jan 2013. The color coding represents different months.

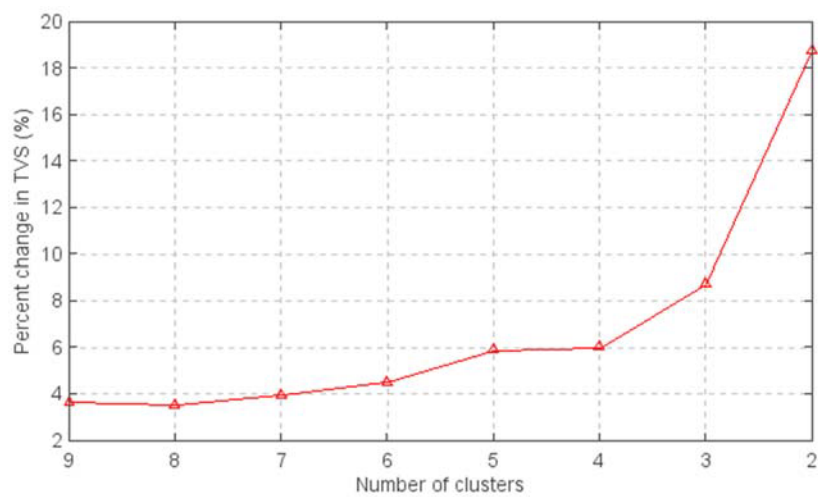

**Figure S12.** Total spatial variance (TSV) as a function of number of clusters in back trajectories clustering analysis.

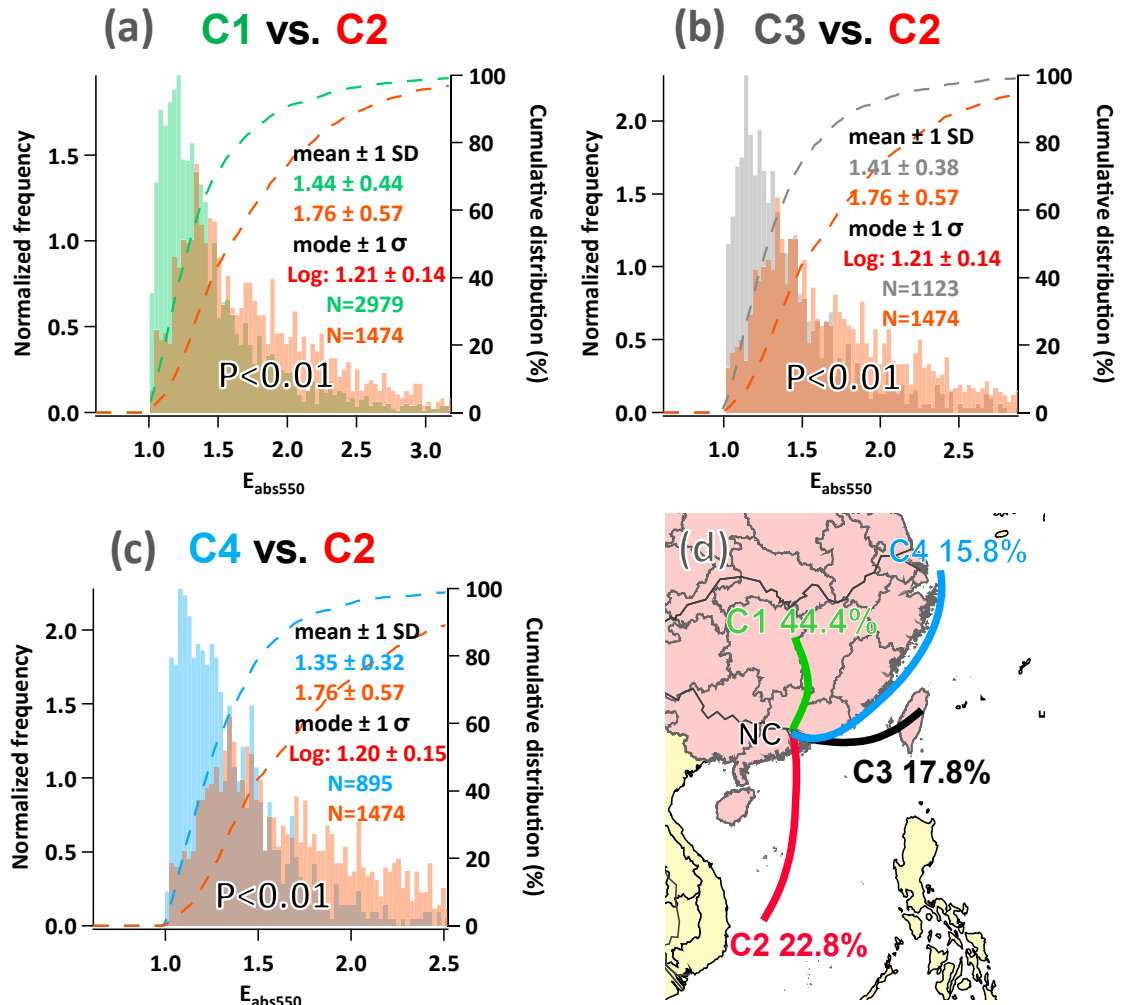

**Figure S13.** Frequency distributions of  $E_{abs550}$  by different air mass clusters. P values are calculated from Wilcoxon-Mann-Whitney tests.

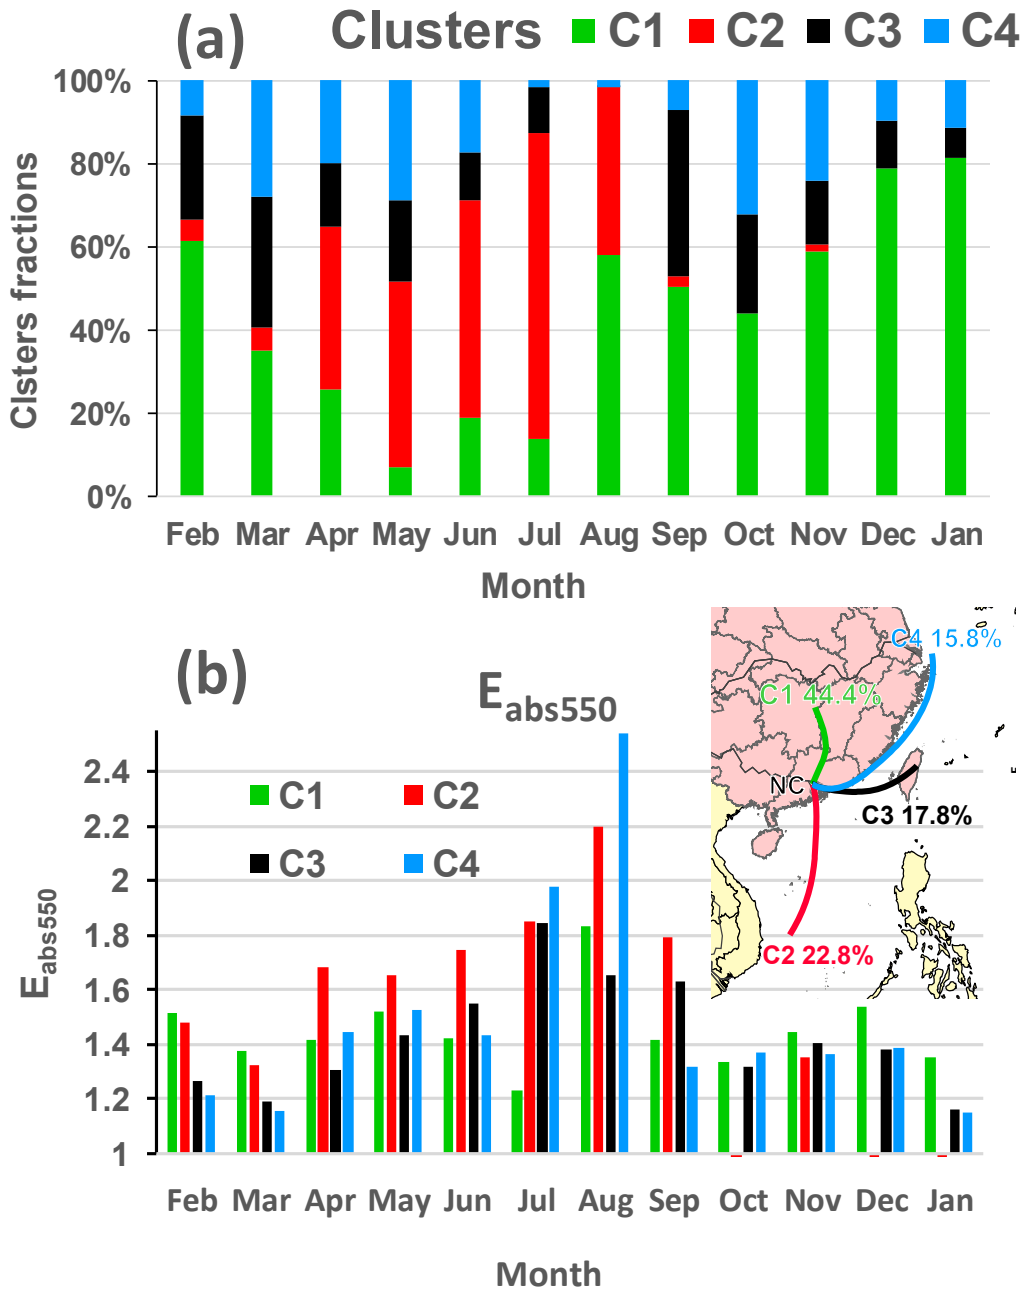

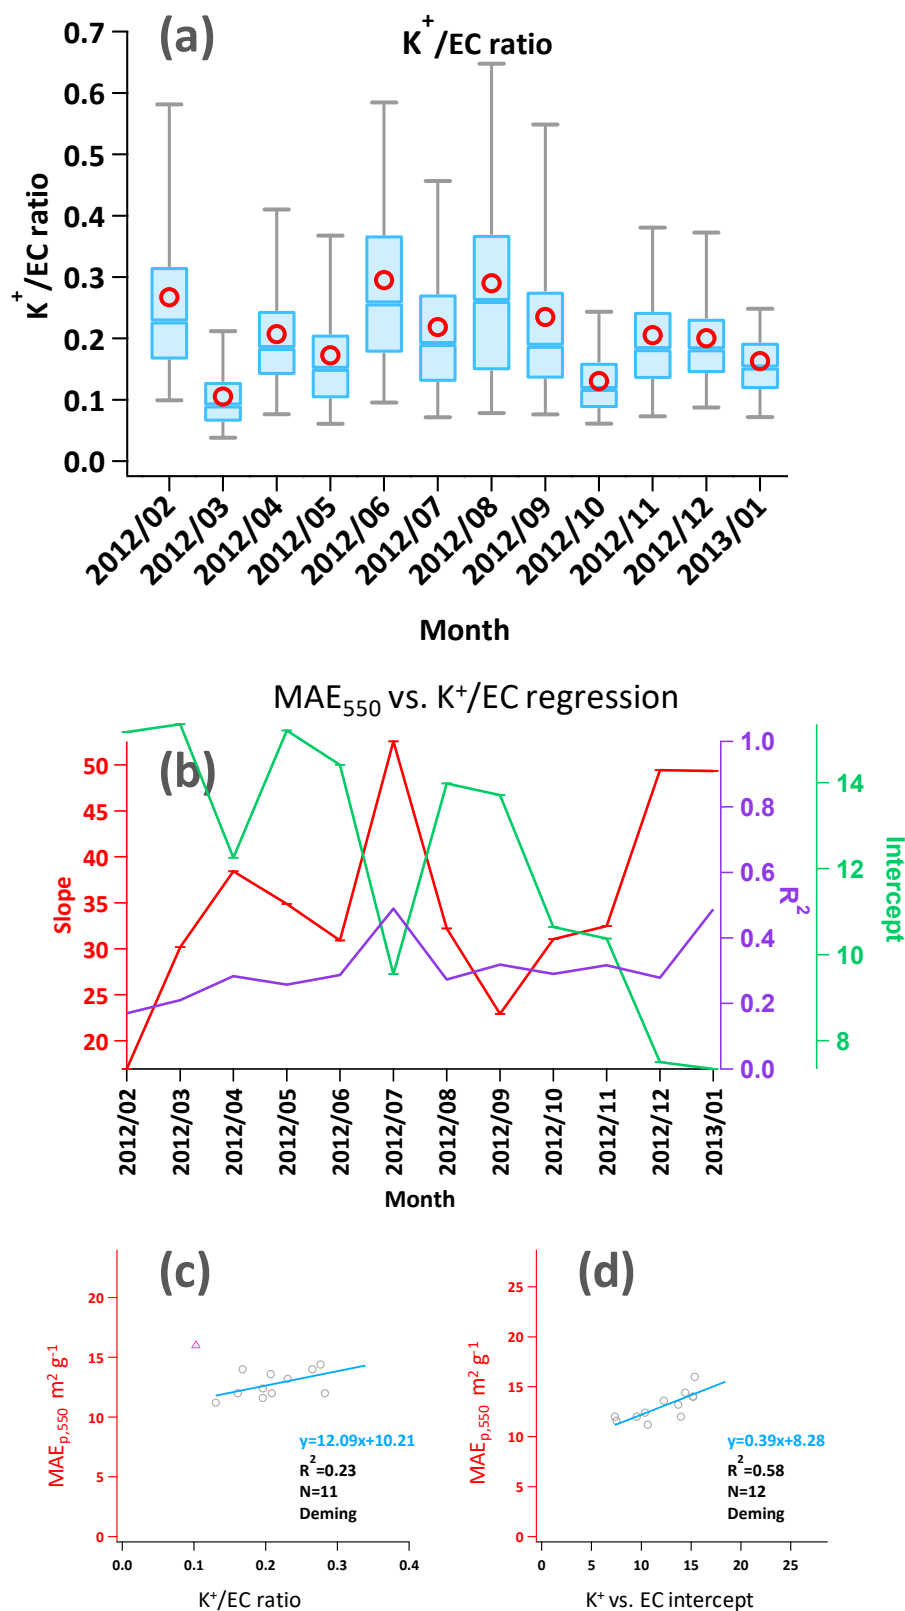

**Figure S15.** (a) Monthly variations of  $K^+ / EC$  ratio from 2012 Feb to 2013 Jan at NC site. (b) Monthly regressions between MAE<sub>550</sub> and  $K^+ / EC$  with slope in red, intercept in green and  $R^2$  in purple. (c) regressions between monthly MAE<sub>p,550</sub> and  $K^+ / EC$ . (d) regression between monthly MAE<sub>p,550</sub> and intercepts from (b).

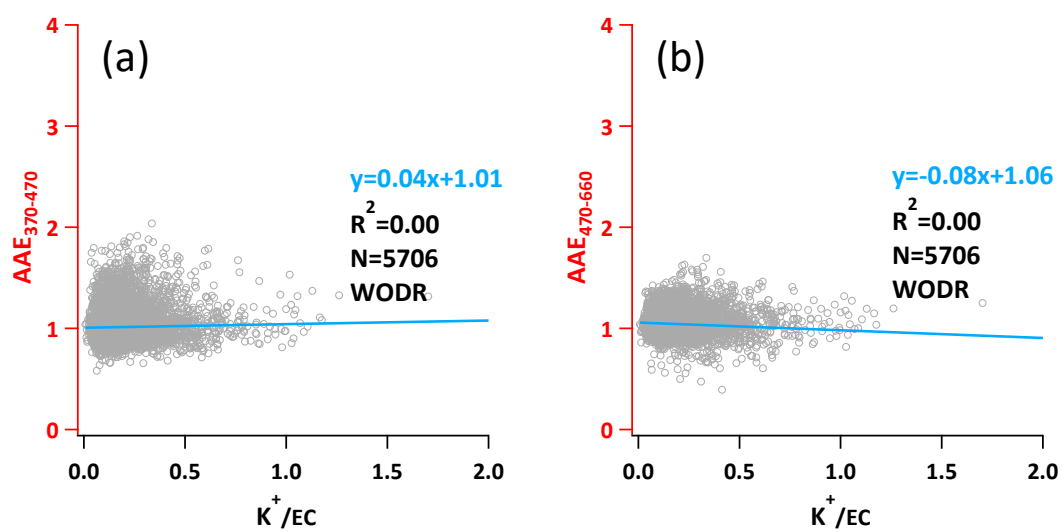

**Figure S16.** Correlations of AAE with  $K^+/EC$  ratio (biomass burning indicator). (a) AAE from 370 – 470 nm. (b) AAE from 470 – 660 nm.

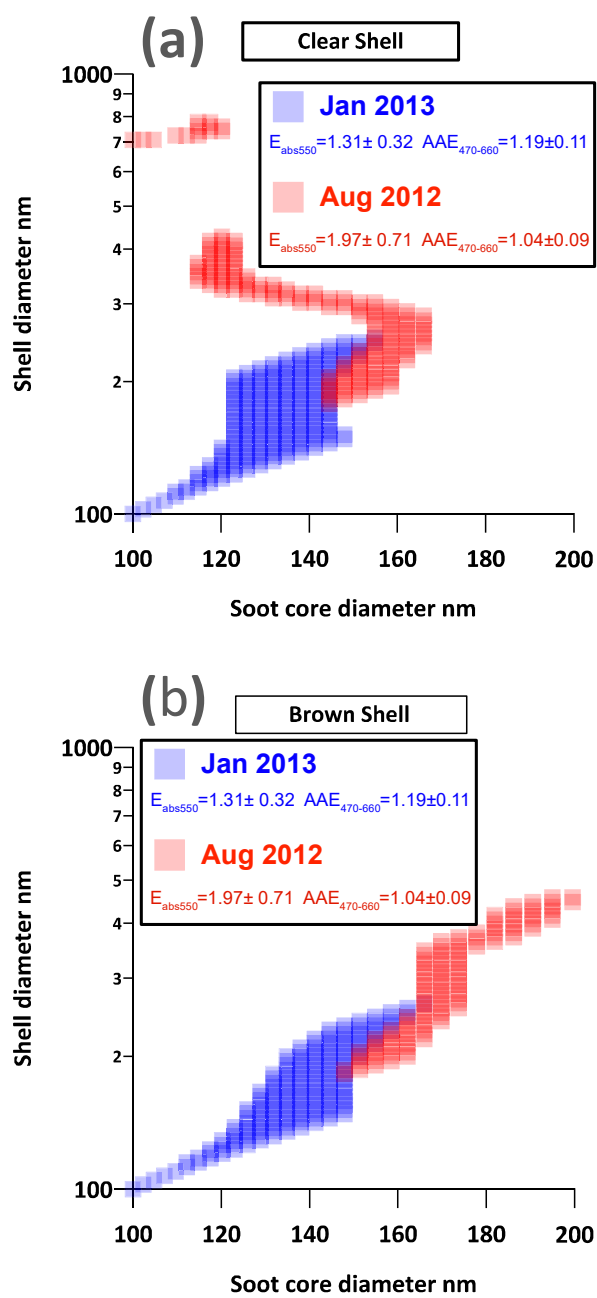

**Figure S17.** Size range of soot particles constrained by  $E_{\text{abs}}$ ,  $SSA_{525}$  and  $AAE_{470-660}$  from measurements. (a) Clear shell scenario; (b) Brown shell scenario

# Test A

Original data

Systematically biased data

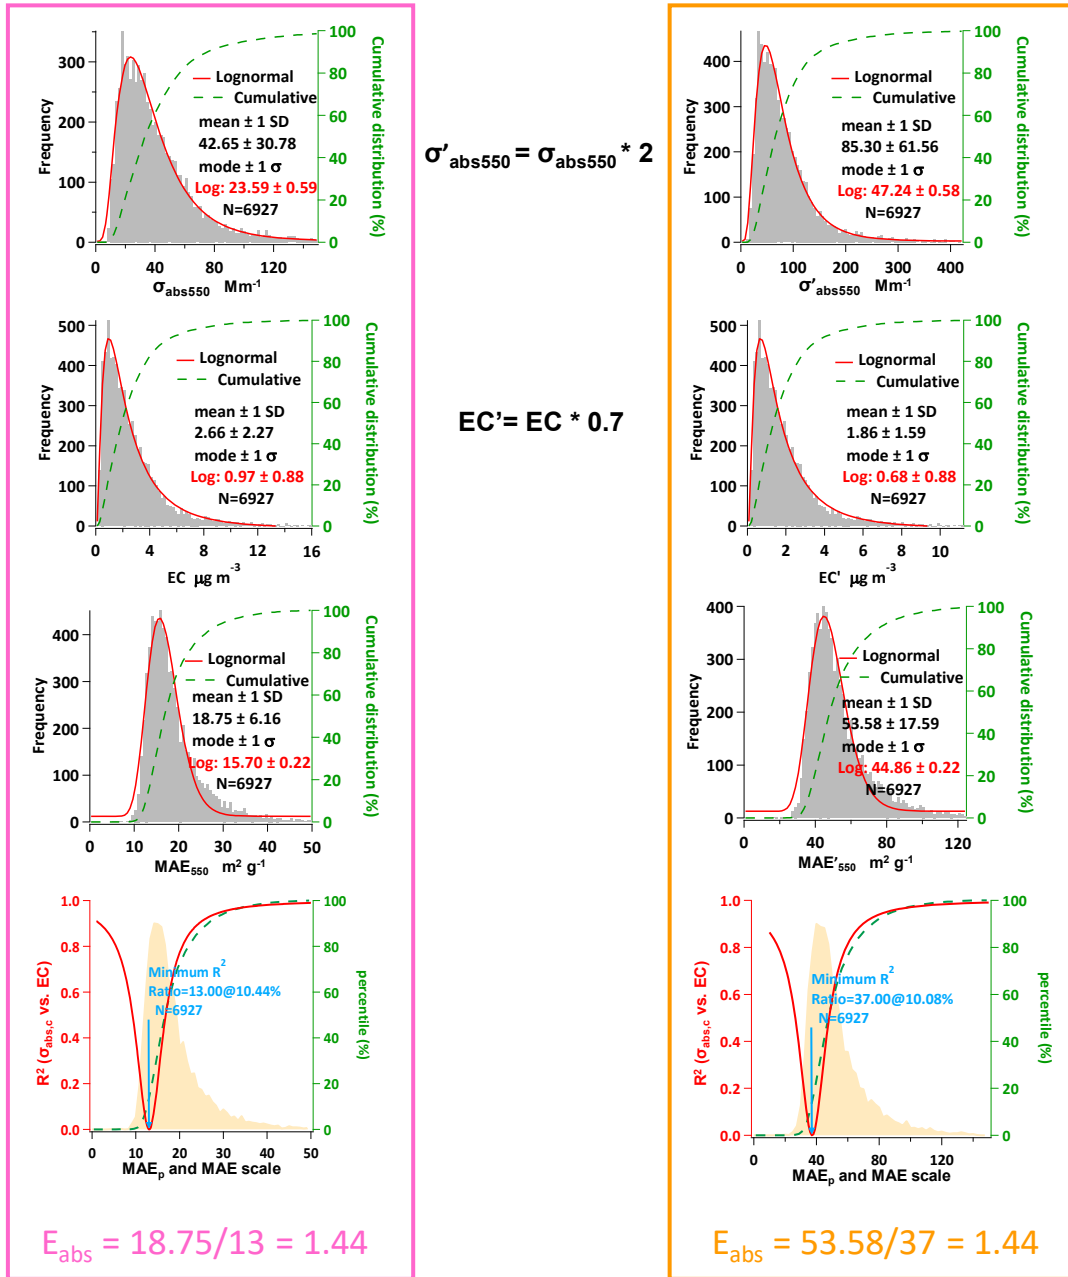

**Figure S18.** Comparison of  $E_{abs}$  from original data and systematically biased data (Test A). It should be noted that the  $E_{abs}$  shown here is ratio of averages, which is different from the annual average  $E_{abs}$  calculated from average of ratios.



# Test B

Original data

Systematically biased data

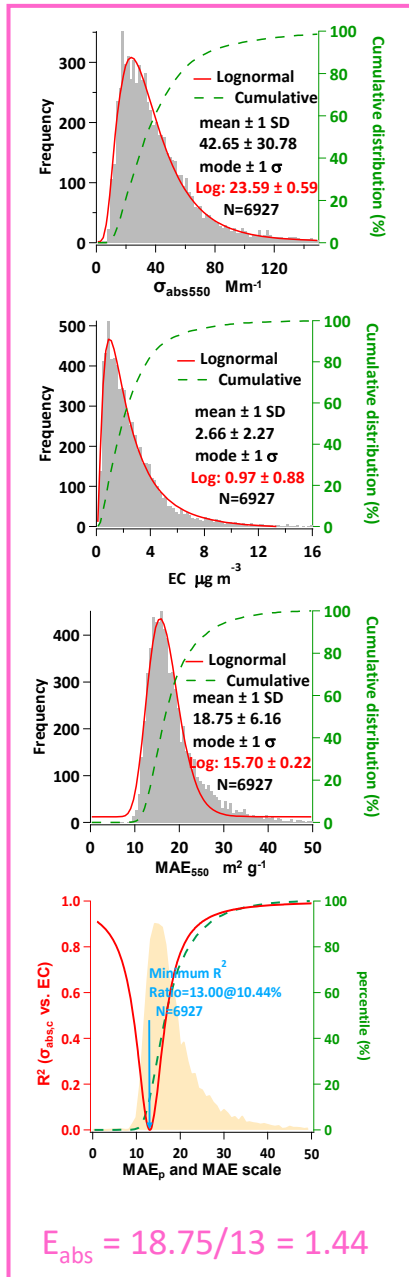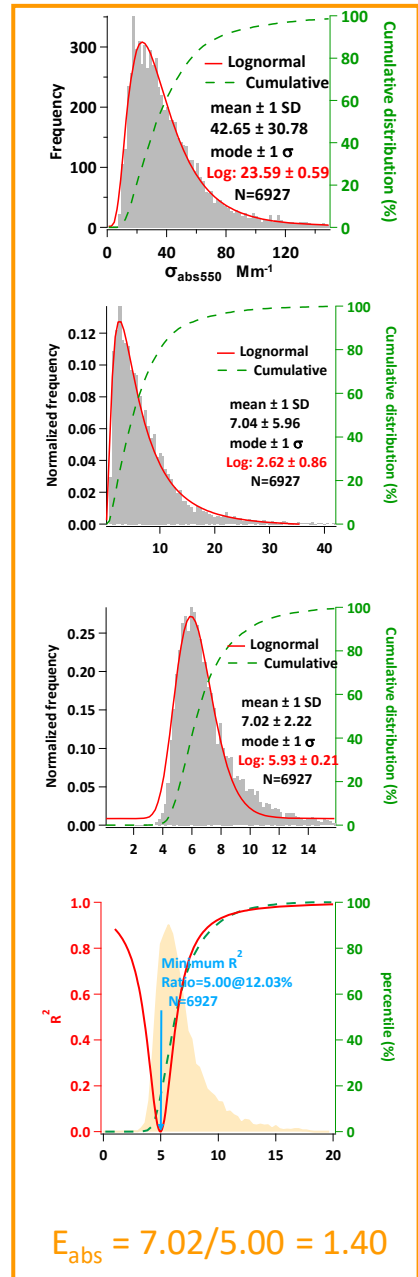

**Figure S19.** Comparison of  $E_{\text{abs}}$  from data using NIOSH EC and data using IMPROVE EC (Test B). It should be noted that the  $E_{\text{abs}}$  shown here is ratio of averages, which is different from the annual average  $E_{\text{abs}}$  calculated from average of ratios.

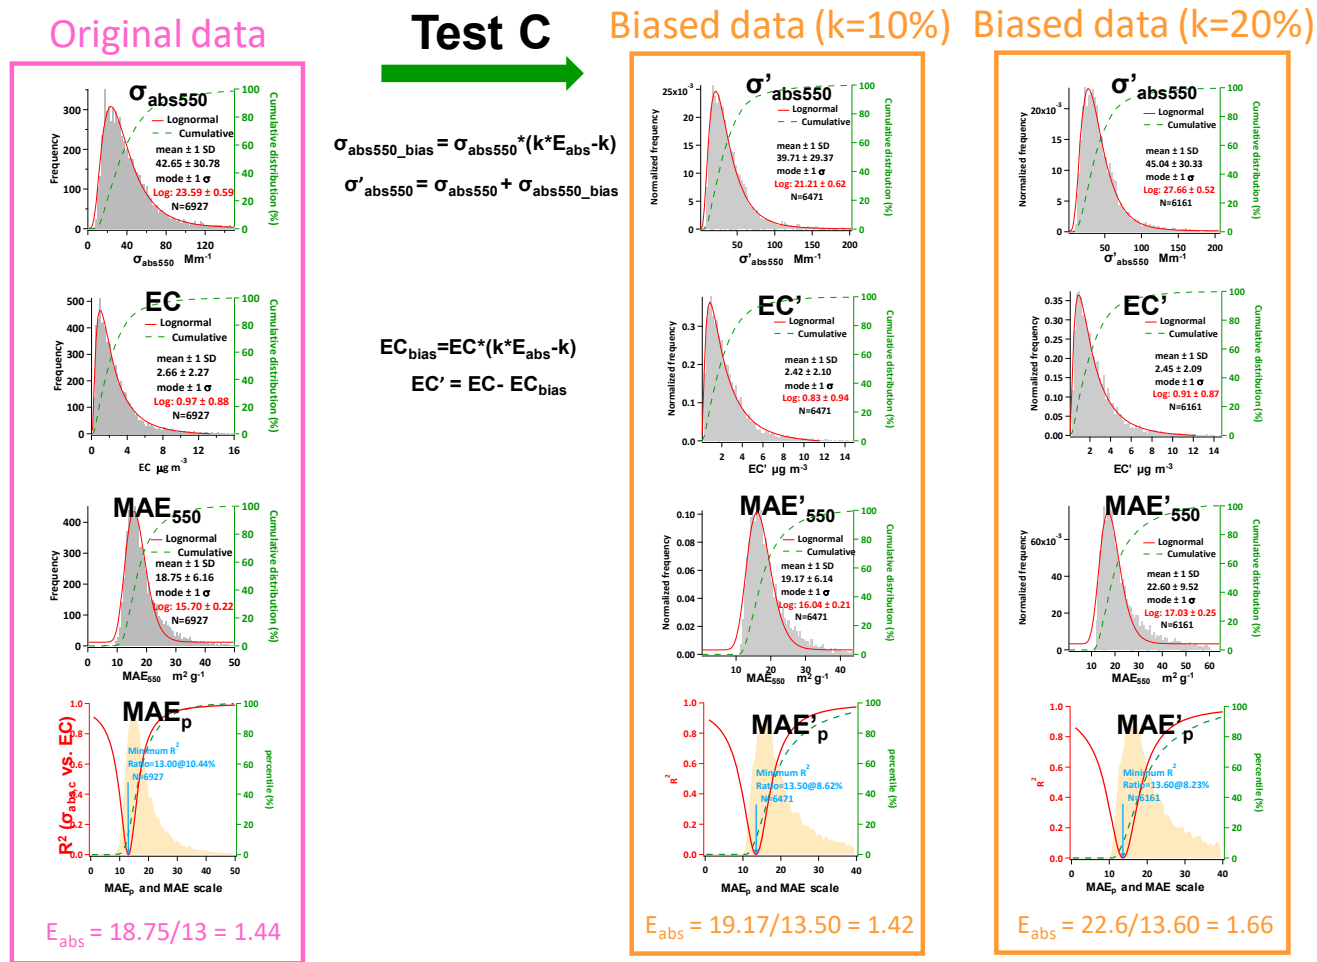

**Figure S20.** Comparison of  $E_{abs}$  from data using original data and  $E_{abs}$  depended biased data (Test C). It should be noted that the  $E_{abs}$  shown here is ratio of averages, which is different form the annual average  $E_{abs}$  calculated from average of ratios.

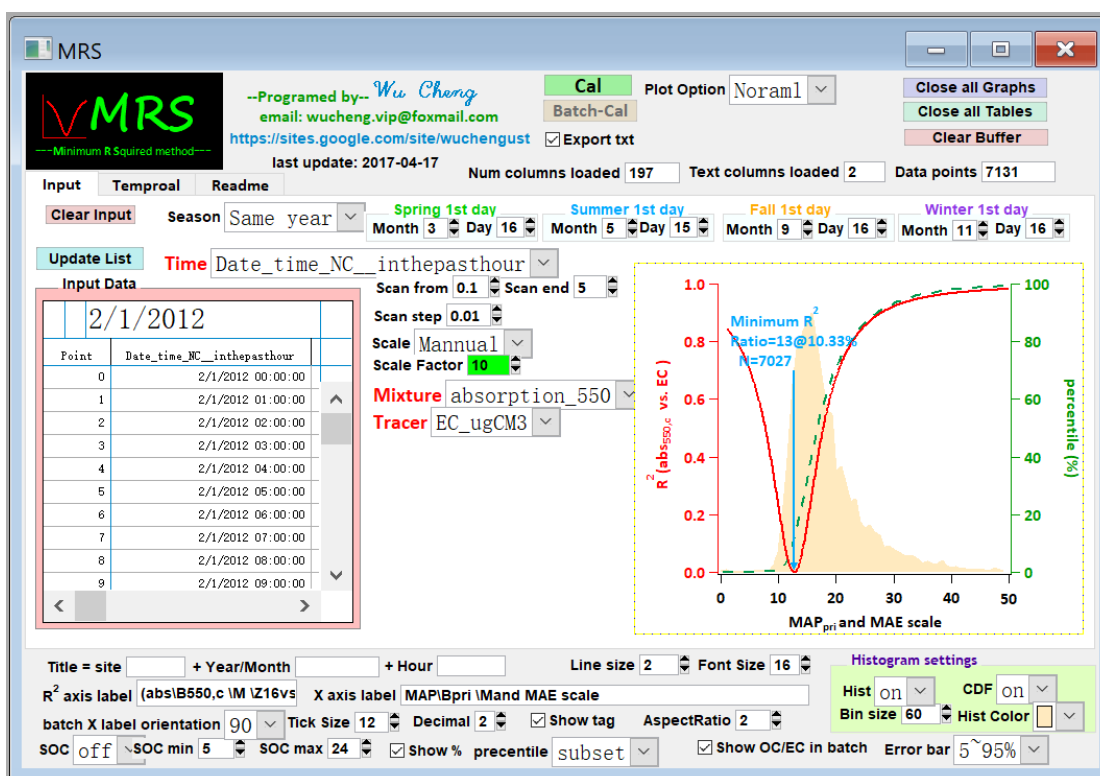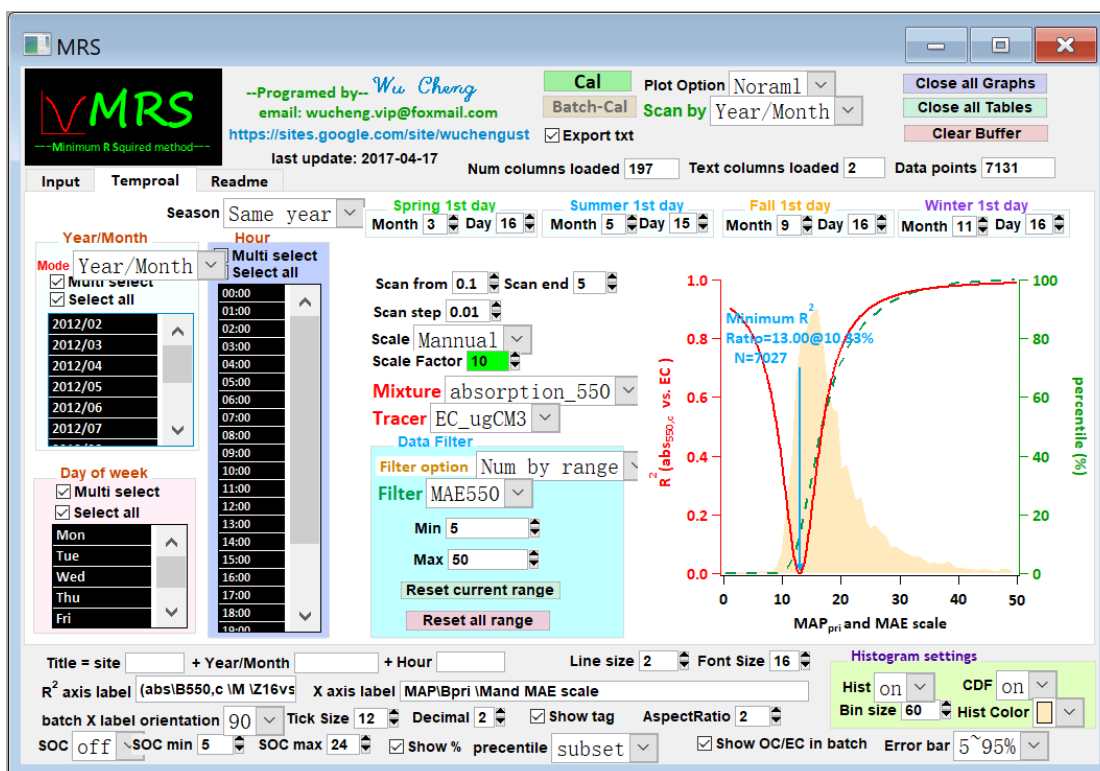

Figure S21. MRS program written in Igro Pro (WaveMetrics, Inc. Lake Oswego, OR, USA). Available from <https://sites.google.com/site/wuchengust>.

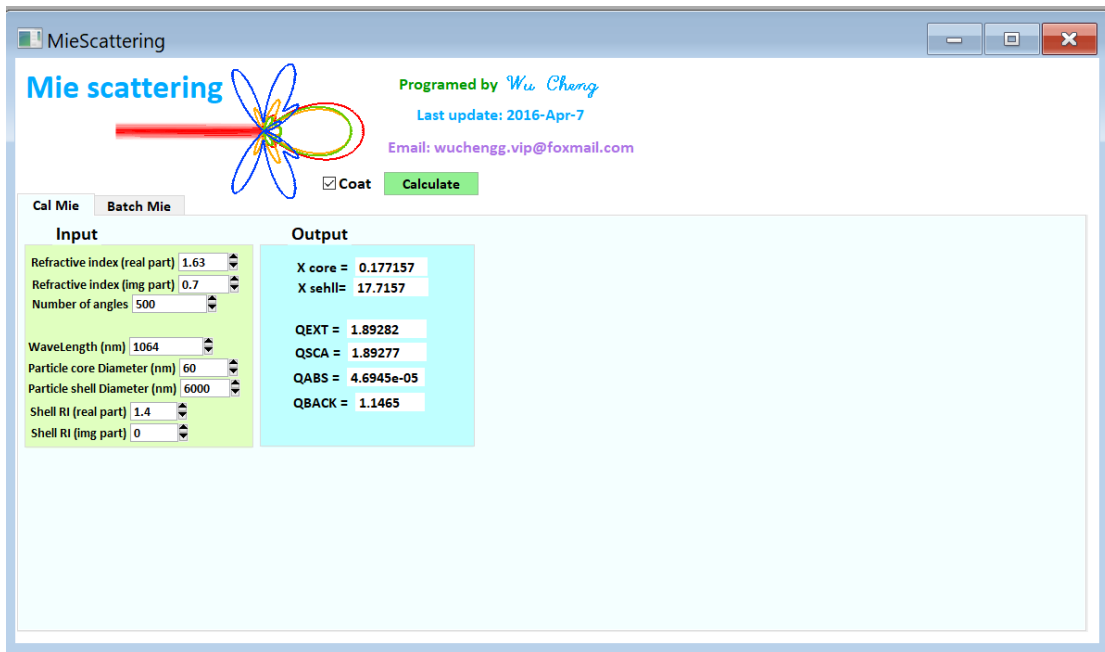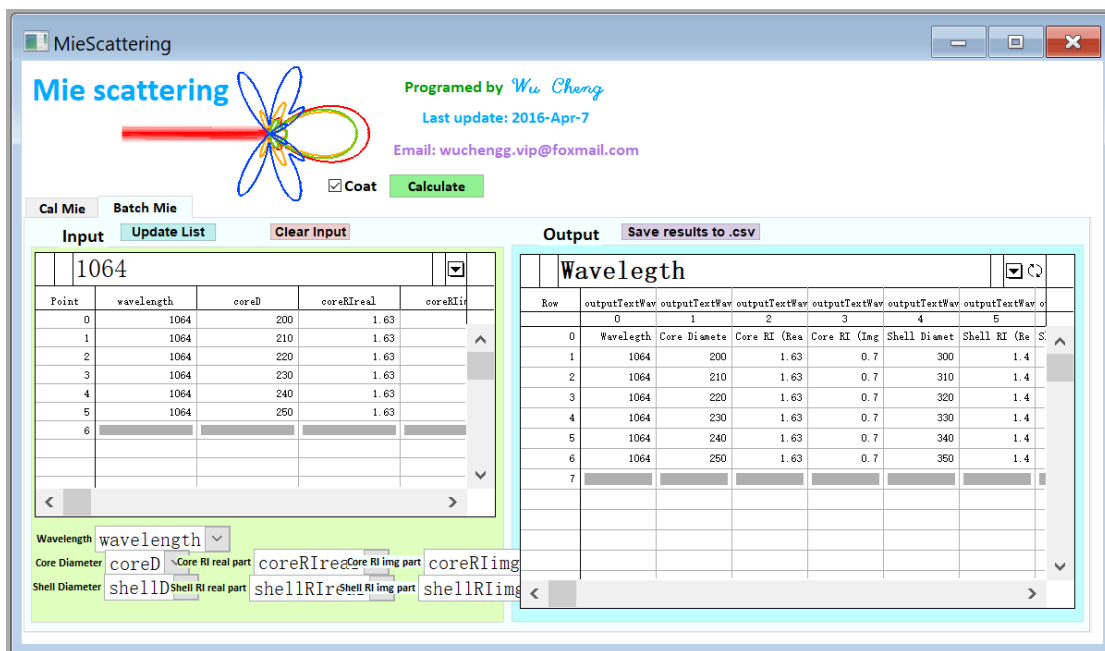

**Figure S22.** Mie program written in Igro Pro (WaveMetrics, Inc. Lake Oswego, OR, USA). Available from <https://sites.google.com/site/wuchengust>.

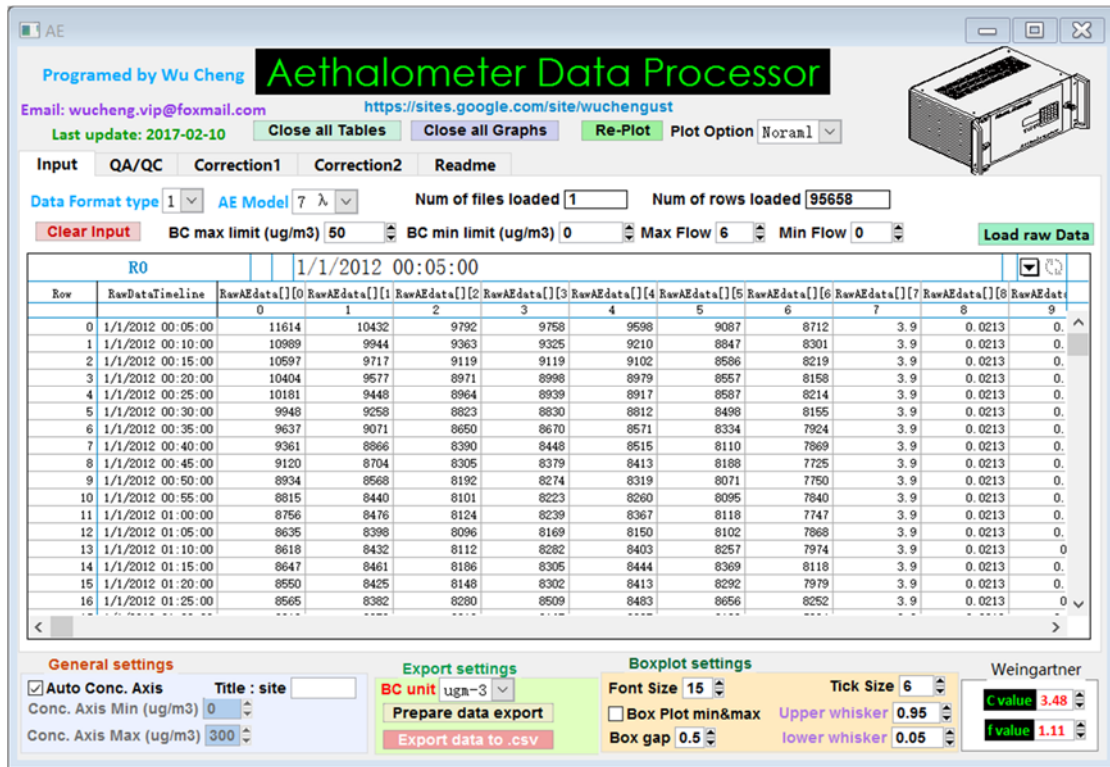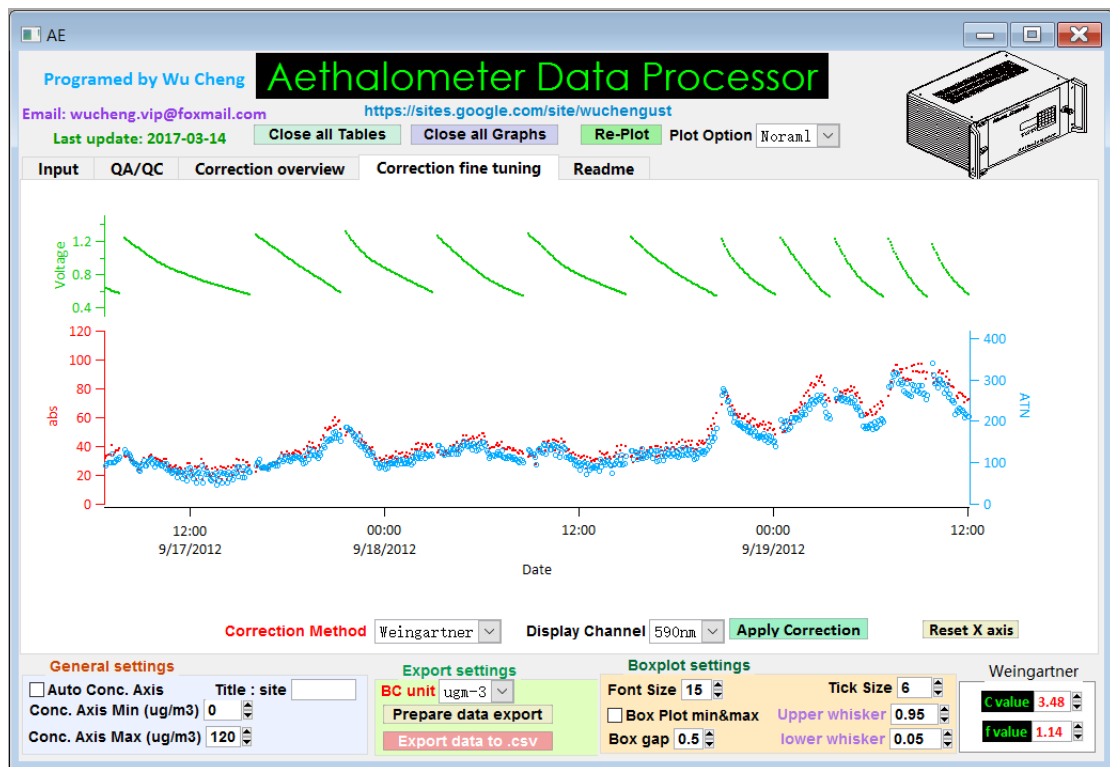

**Figure S23.** Aethalometer data processing program written in Igro Pro (WaveMetrics, Inc. Lake Oswego, OR, USA). Available from <https://sites.google.com/site/wuchengust>.

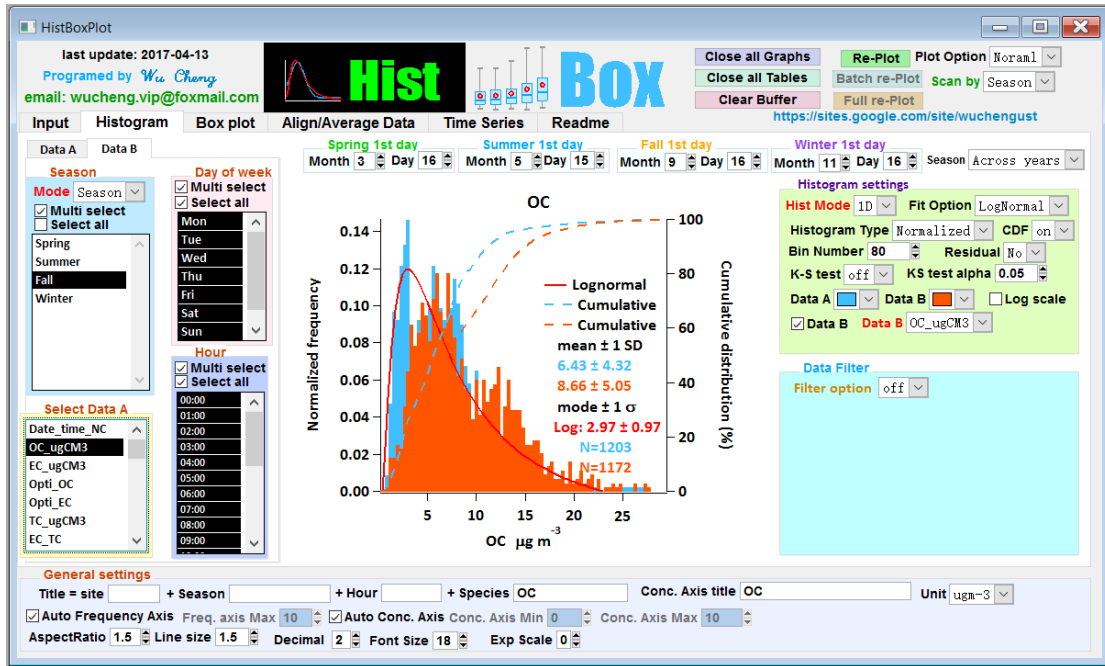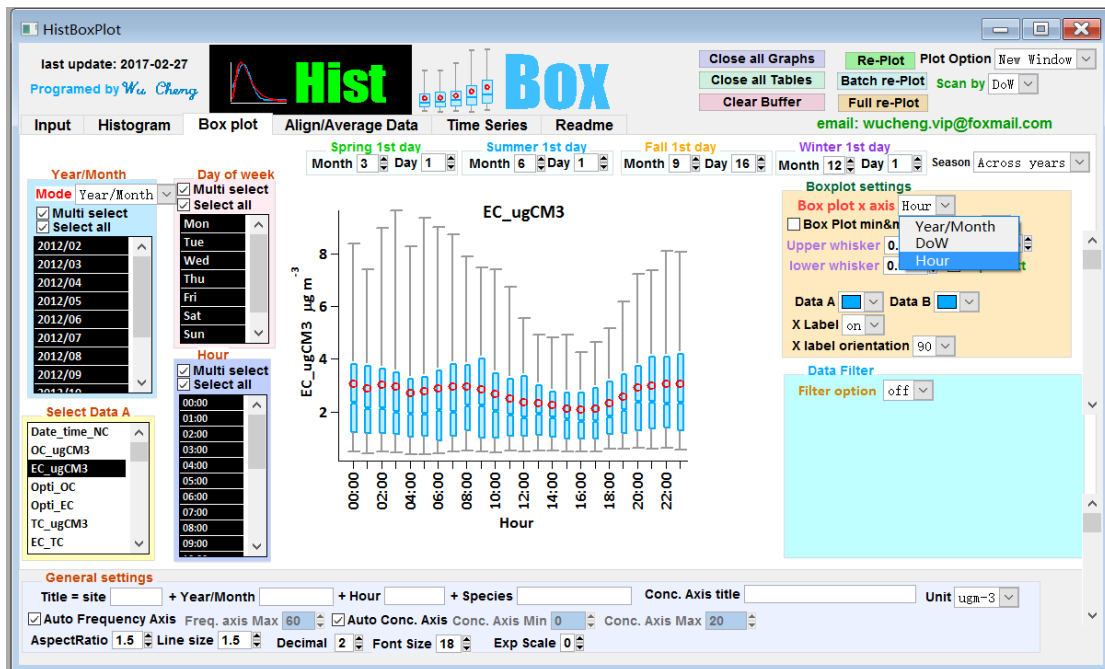

Figure S24. Histbox program written in Igro Pro (WaveMetrics, Inc. Lake Oswego, OR, USA). Available from <https://sites.google.com/site/wuchengust>.

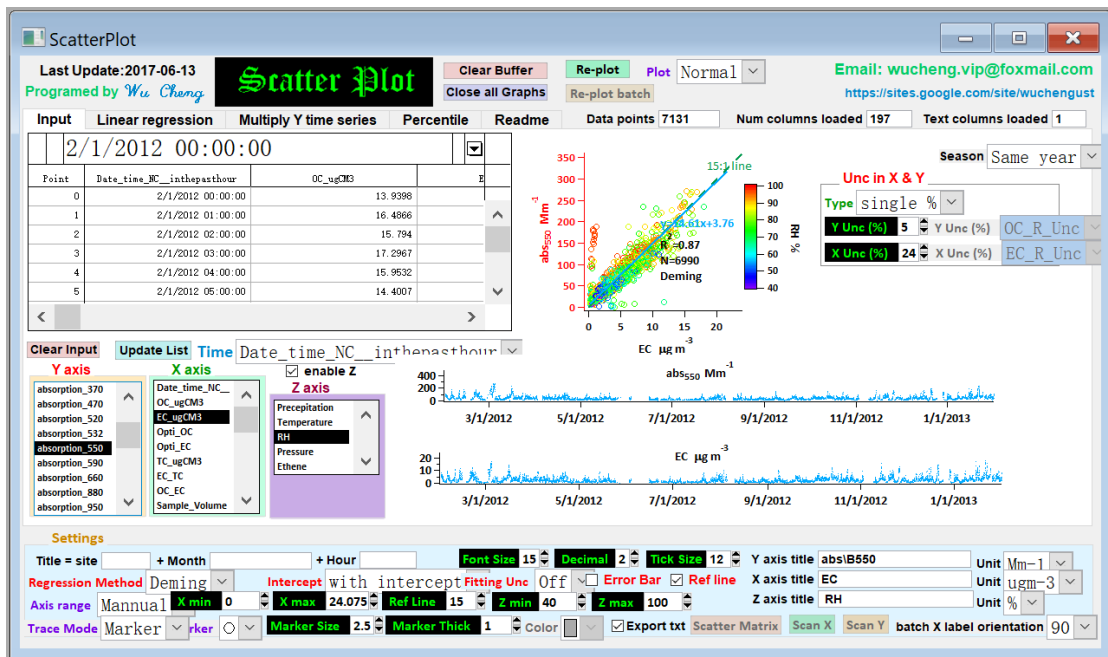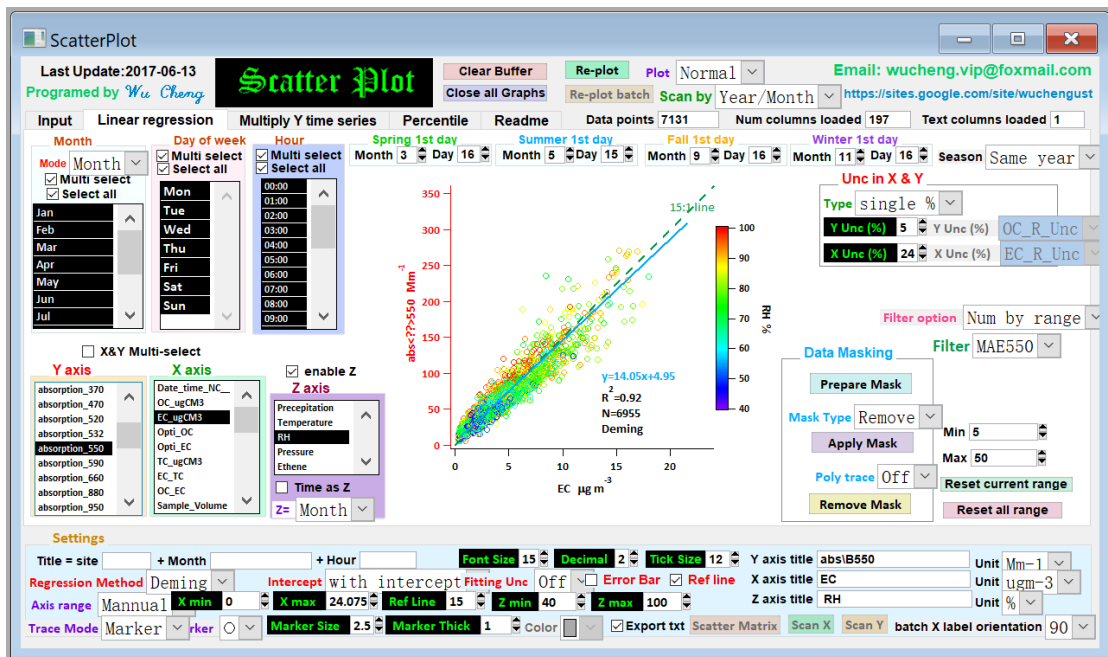

Figure S25. Scatter plot program written in Igro Pro (WaveMetrics, Inc. Lake Oswego, OR, USA). More details can be found in a separated paper (Wu and Yu, 2017). Available from <https://sites.google.com/site/wuchengust>.
